# Supplementary material
Source: PubMed Central journal article supplement (PMC9069563)
Supplement: NIHMS1802497-supplement-Mak_et_al_2021_supplemental_material.pdf [file NIHMS1802497-supplement-Mak_et_al_2021_supplemental_material.pdf]

Supplementary Information for

Detecting lysosomal storage disorders by glycomic profiling  
using liquid chromatography mass spectrometry

Justin Mak <sup>1</sup> and Tina M. Cowan <sup>1,2</sup>

<sup>1</sup> Clinical Biochemical Genetics Laboratory, Stanford Health Care

<sup>2</sup> Department of Pathology, Stanford University Medical Center

**Table of Contents**

|                                                                                                                                    |    |
|------------------------------------------------------------------------------------------------------------------------------------|----|
| Figure S1. Resolution of glucosylsphingosine from galactosylsphingosine.....                                                       | 2  |
| Figure S2. Chromatographic resolution of hex4 isomers that differentiate MOGS from Pompe disease.....                              | 3  |
| Figure S3. MPS biomarker spectra.....                                                                                              | 4  |
| Figure S4. Chromatographic resolution of two ion features both annotated as hexNAc-s that can differentiate MPS 4a from MPS 6..... | 45 |
| Figure S5. Detailed Z-scores for each sample.....                                                                                  | 46 |
| Figure S6. Limits of detection for glycolipids. ....                                                                               | 47 |
| Table S1. Detailed methods for the LC-MS analyses.....                                                                             | 48 |

## Figure S1. Resolution of glucosylsphingosine from galactosylsphingosine.

ERNDIM Special Assays in Serum (SAS) samples were acquired using the targeted LC-MS/MS method. Representative extracted ion chromatograms show baseline resolution of glucosylsphingosine (1.88 min) from galactosylsphingosine-d5 (2.01 min). ERNDIM samples do not contain galactosylsphingosine. Resolution of unlabeled glucosylsphingosine and galactosylsphingosine is shown in Figure 1a.

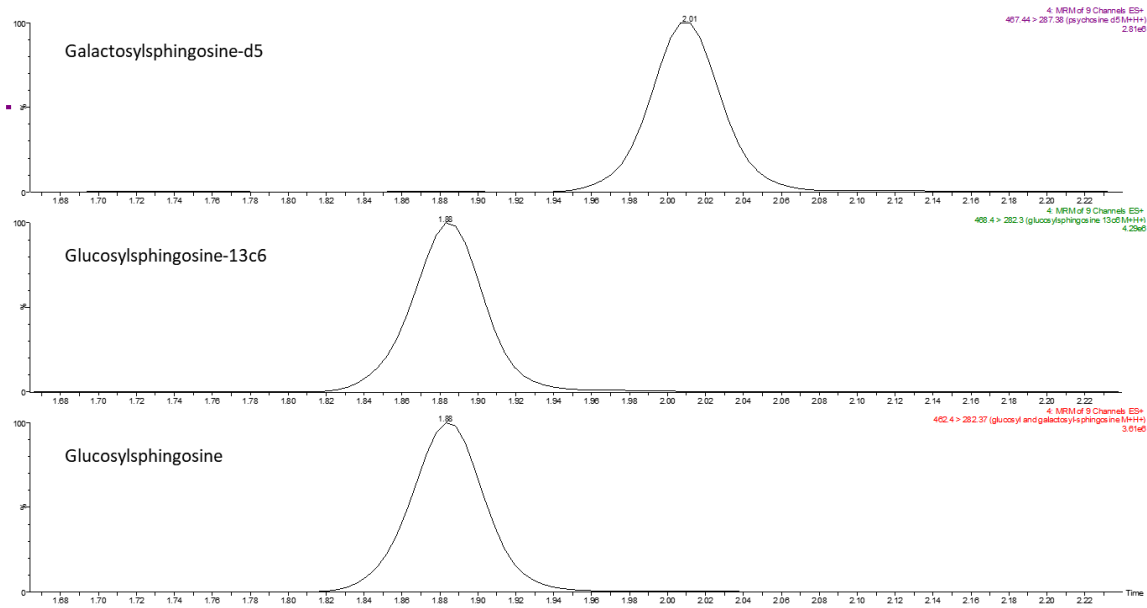

## Figure S2. Chromatographic resolution of hex4 isomers that differentiate MOGS from Pompe disease.

Urines from patients with Mannosyl-oligosaccharide Glucosidase (MOGS) 1 deficiency and Pompe disease were acquired using the targeted LC-MS/MS method. Representative extracted ion chromatograms show baseline resolution of a compound annotated as glc3-man in MOGS (4.35 min) from glc4 in Pompe disease (4.6 min). Maltotetraose (authentic standard; 4.5 min) is also included to visualize chromatographic resolution.

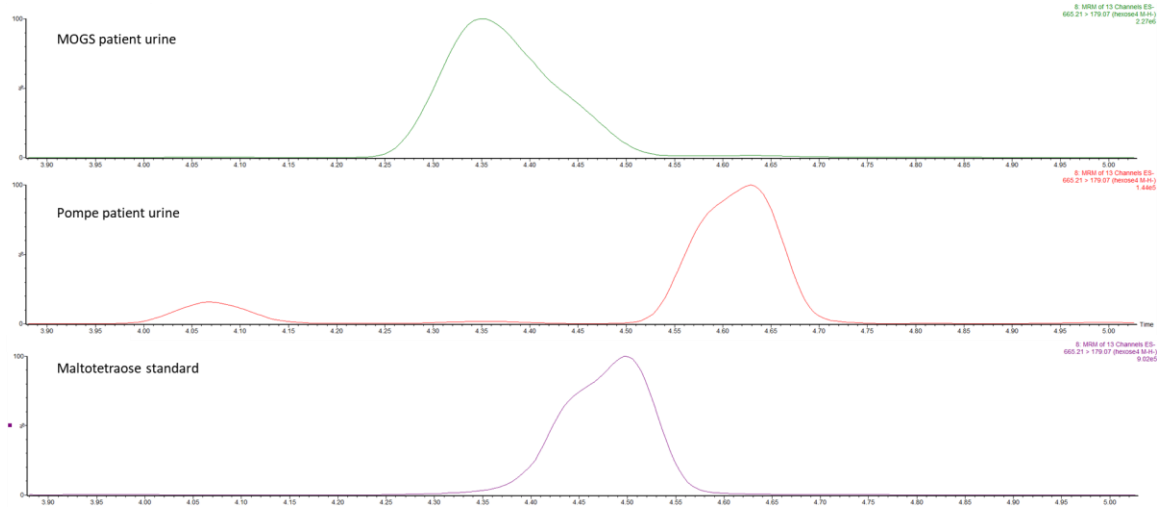

### Figure S3. MPS biomarker spectra.

To validate spectra generated by Data Independent Acquisition (DIA) for each of the twenty MPS biomarkers, select urine samples were re-acquired on the Waters Vion using Data Dependent Acquisition (DDA) with ion-mobility enabled. For DDA, total MS cycle times ranged from 0.5-1 second, with each DDA scan set to 0.1-0.2 seconds. An MS/MS inclusion list containing each MPS biomarker's m/z and retention time was created and set to preferential or dedicated MS/MS acquisition. Various capillary voltages, cone voltages, and collision energy ramps were used to generate ideal DDA data. Representative DDA data is shown. DIA scans are included for comparison. Except where indicated, negative ESI was used. The Waters Unifi *in-silico* fragmentation algorithm was used to make structural assignments (indicated by blue dots or chemical structures above ions).

## Biomarker number: 1

**Annotation: hexNAc-s-UA-hexNAc-s-UA; Formula: C<sub>28</sub>H<sub>44</sub>N<sub>2</sub>O<sub>29</sub>S<sub>2</sub>**

Item name: 2020-11-12-sample009-DDA-MPS1-001  
Channel name: 2: +467.0650 (37.4 PPM) : DT=3.62 to 3.80 ms : DDA HD TOF MS (60-1200) 5V ESI- : Integrated : Smoothed

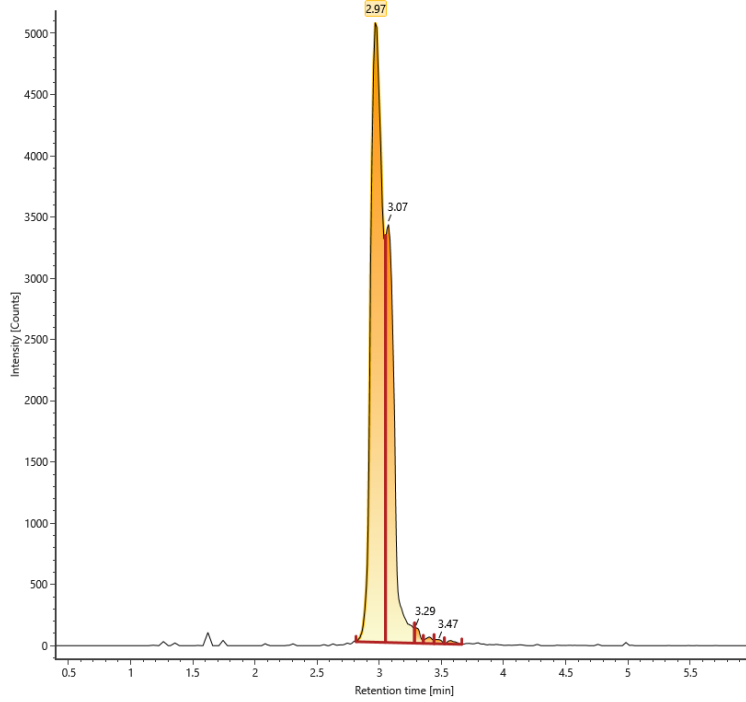

Item name: 2020-11-12-sample009-DDA-MP... Channel name: MS precursor : RT=2.9939 min...  
Item description:

2.83e4

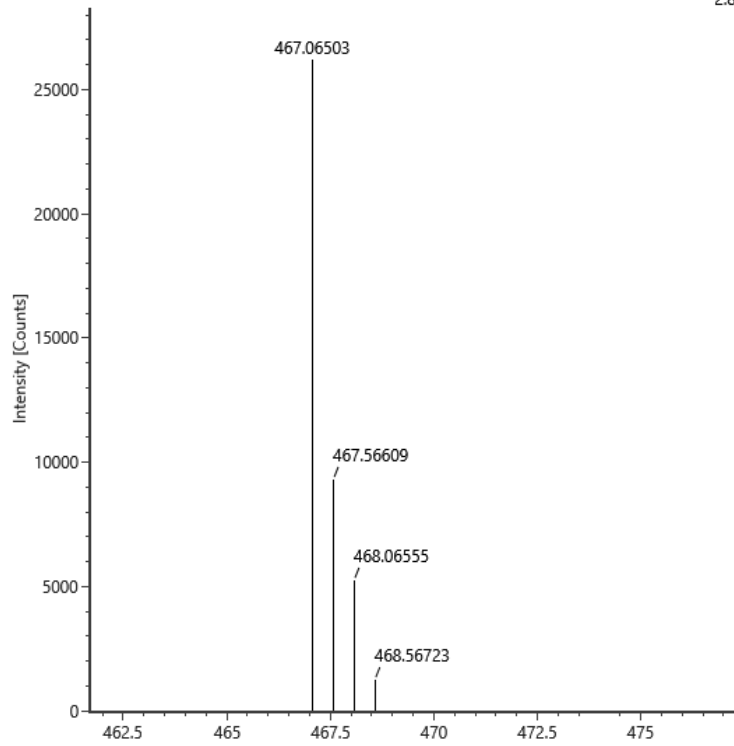

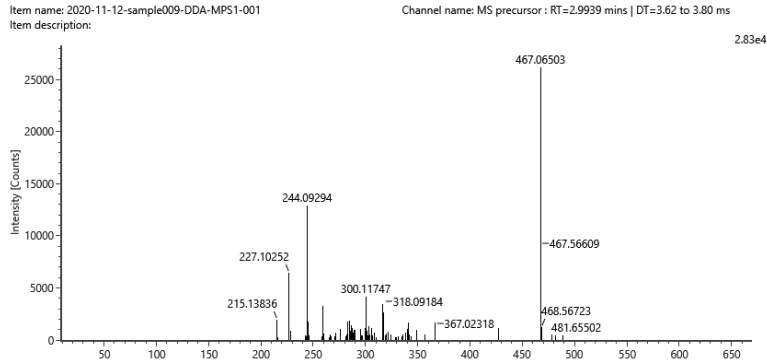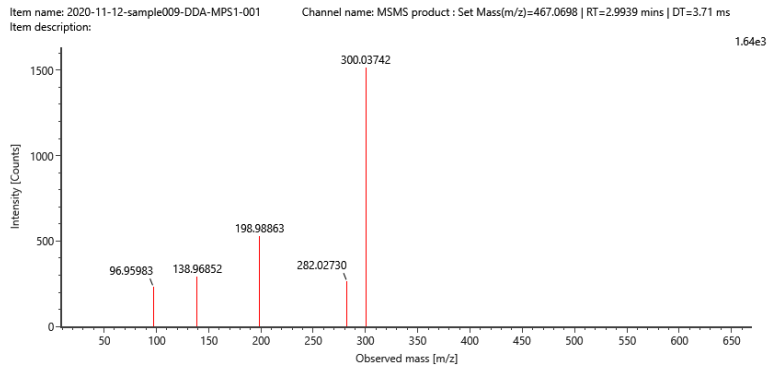

### Left Shoulder-DIA

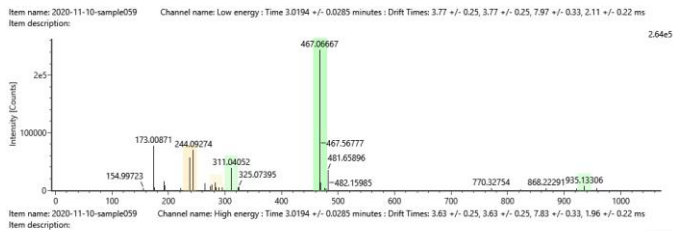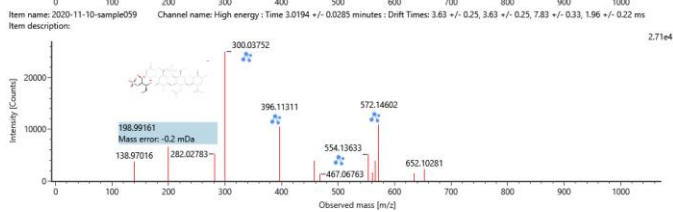

### Right Shoulder-DIA

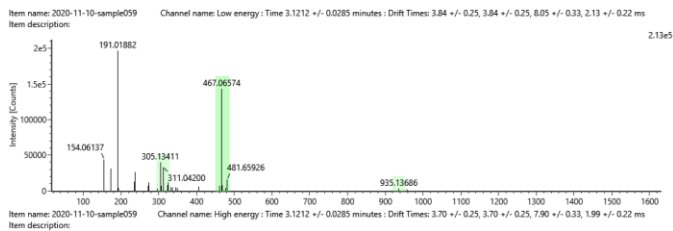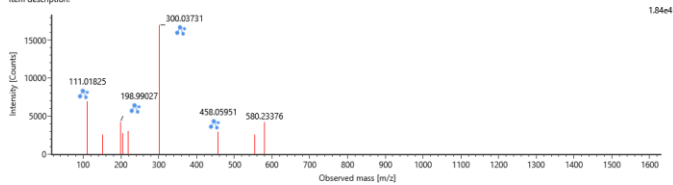

## Biomarker number: 2

### Annotation: UA-s-hexNAc-UA; Formula: C<sub>20</sub>H<sub>31</sub>NO<sub>21</sub>S

Item name: 2020-11-10-sample059-mps1-dda-002  
Channel name: 2 - 652.1001 (37.0 PPM) : DT=6.19 to 6.51 ms : DDA HD TOF MS (60-1600) 5V ESI- : Integrated : Smoothed

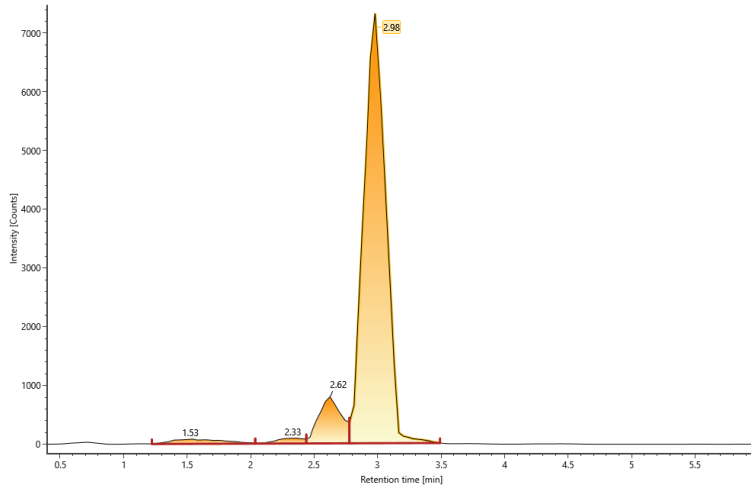

Item name: 2020-11-10-sample059-mps1-dda-002  
Channel name: MS precursor : RT=2.9727 mins | DT=6.19 to 6.51 ms  
Item description: 5.79e4

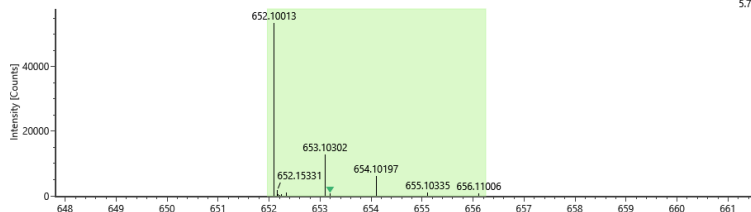

Item name: 2020-11-10-sample059-mps1-dda-002  
Channel name: MSMS product : Set Mass(m/z)=652.1145 | RT=2.9727 mins | DT=6.35 ms  
Item description: 272

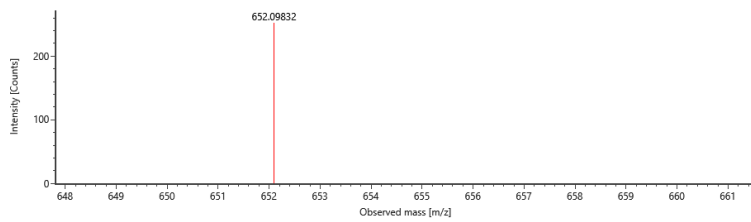

Item name: 2020-11-10-sample059-mps1-dda-002  
Channel name: MS precursor : RT=2.9727 mins | DT=6.19 to 6.51 ms  
Item description: 5.79e4

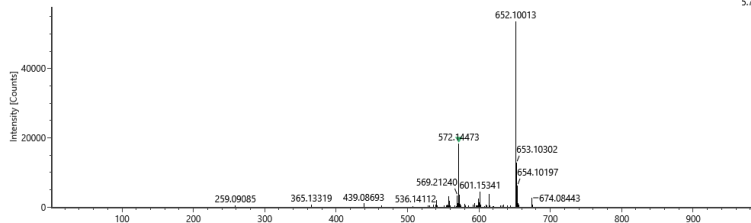

Item name: 2020-11-10-sample059-mps1-dda-002  
Channel name: MSMS product : Set Mass(m/z)=652.1145 | RT=2.9727 mins | DT=6.35 ms  
Item description: 3.02e3

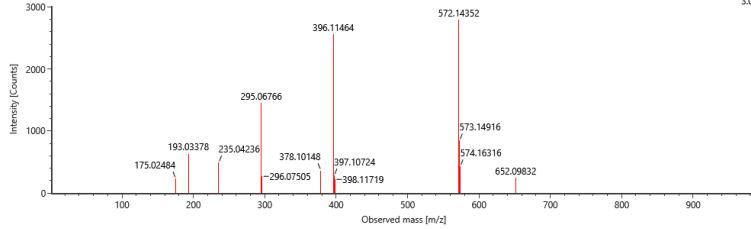





## Biomarker number: 3

### Annotation: hexN-s-UA; Formula: C<sub>12</sub>H<sub>21</sub>NO<sub>14</sub>S

Item name: 2020-11-21-sample003

Channel name: 2- +434.0588 (36.5 PPM) : DT=4.74 to 4.99 ms : DDA HD TOF MS (60-1600) 5V ESI- : Integrated : Smoothed

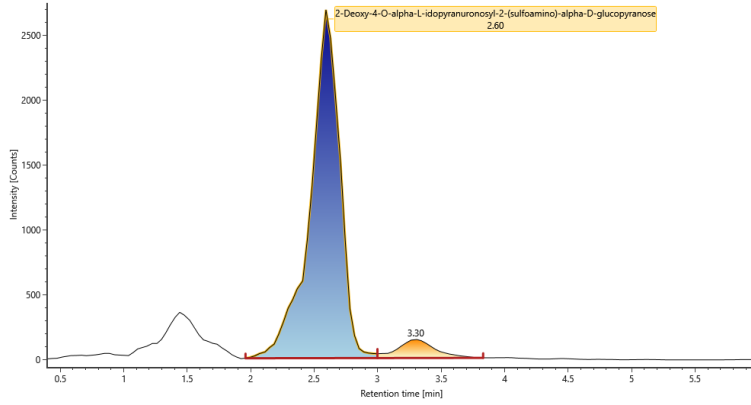

Item name: 2020-11-21-sample003

Item description:

Channel name: MS precursor : RT=2.5784 mins | DT=4.74 to 4.99 ms

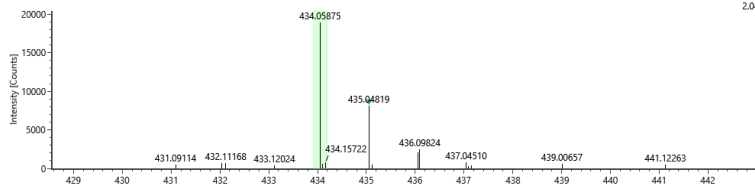

Item name: 2020-11-21-sample003

Item description:

Channel name: MSMS product : Set Mass(m/z)=434.0601 | RT=2.5784 mins | DT=4.86 ms

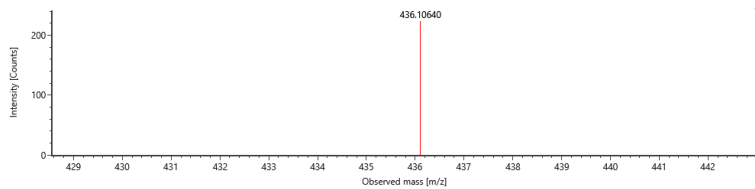

Item name: 2020-11-21-sample003

Item description:

Channel name: MS precursor : RT=2.5784 mins | DT=4.74 to 4.99 ms

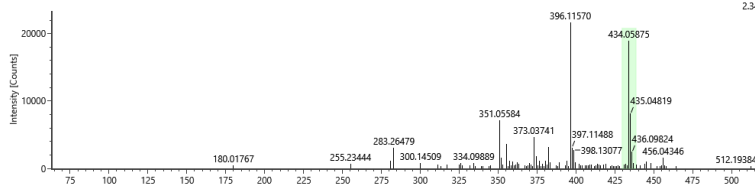

Item name: 2020-11-21-sample003

Item description:

Channel name: MSMS product : Set Mass(m/z)=434.0601 | RT=2.5784 mins | DT=4.86 ms

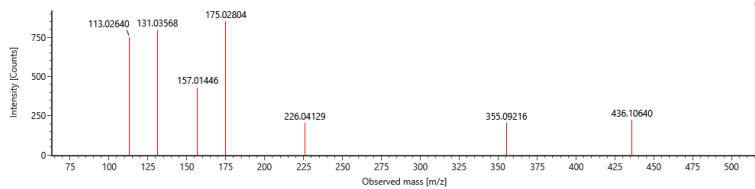

## DIA

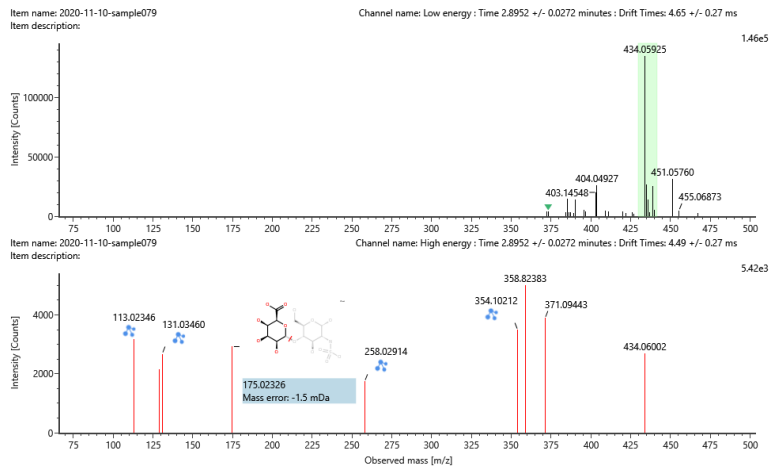

## Biomarker number: 4

### Annotation: hexN-s; Formula: C6H13NO8S

Item name: 2020-11-21-sample003  
Channel name: 2- +258.0272 (36.5 PPM) : DT=2.96 to 3.11 ms : DDA HD TOF MS (60-1600) 5V ESI- : Integrated : Smoothed

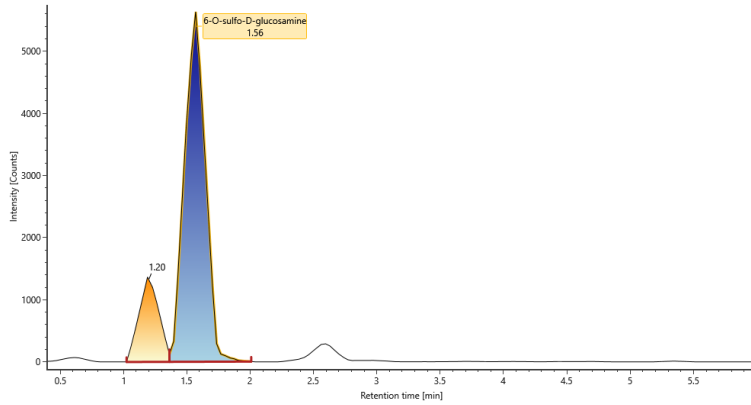

Item name: 2020-11-21-sample003  
Channel name: MS precursor : RT=1.5436 mins | DT=2.96 to 3.11 ms

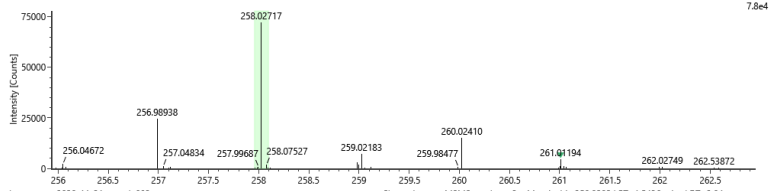

Item name: 2020-11-21-sample003  
Channel name: MSMS product : Set Mass(m/z)=258.0282 | RT=1.5436 mins | DT=3.04 ms

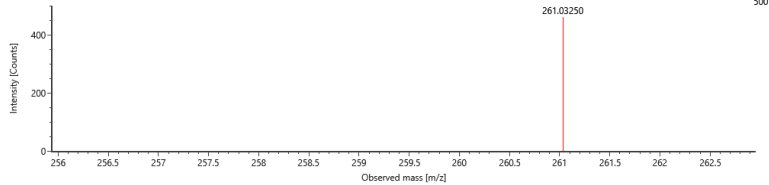

Item name: 2020-11-21-sample003  
Channel name: MS precursor : RT=1.5436 mins | DT=2.96 to 3.11 ms

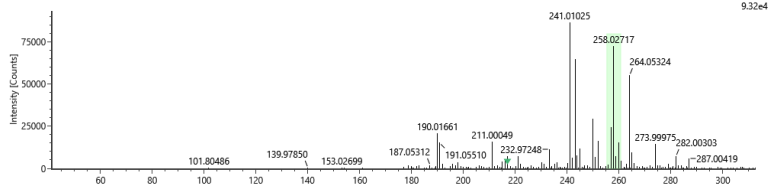

Item name: 2020-11-21-sample003  
Channel name: MSMS product : Set Mass(m/z)=258.0282 | RT=1.5436 mins | DT=3.04 ms

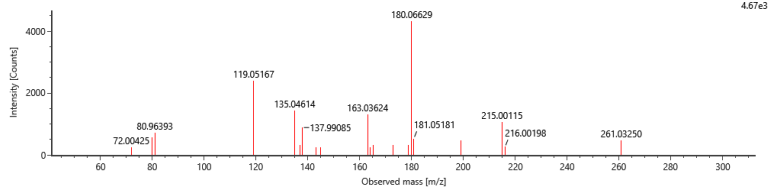

Clean DIA fragmentation spectra not available due to multiple co-eluting compounds with similar drift times.

## Biomarker number: 5

### **Annotation: hexNAc-s-UA-hexNAc-UA; Formula: C<sub>28</sub>H<sub>44</sub>O<sub>26</sub>N<sub>2</sub>S**

Item name: 2020-11-12-sample004  
Channel name: 2: +855.1771 (37.4 PPM) : DT=7.53 to 7.92 ms : DDA HD TOF MS (60-1200) 5V ESI- : Integrated : Smoothed

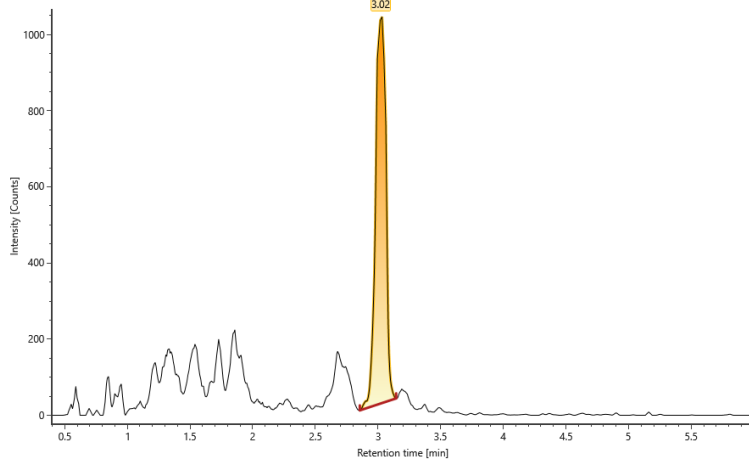

Item name: 2020-11-21-sample004  
Channel name: MS precursor : RT=3.1645 mins | DT=7.88 to 8.29 ms

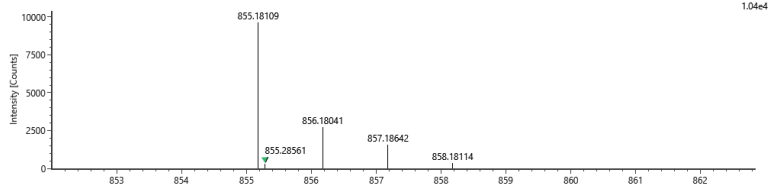

Item name: 2020-11-21-sample004  
Channel name: MSMS product : Set Mass(m/z)=855.1844 | RT=3.1645 mins | DT=8.09 ms

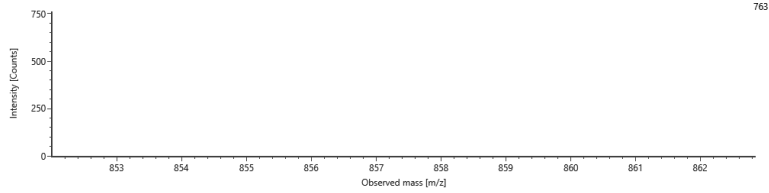

Item name: 2020-11-12-sample004  
Channel name: MS precursor : RT=3.0494 mins | DT=7.53 to 7.92 ms

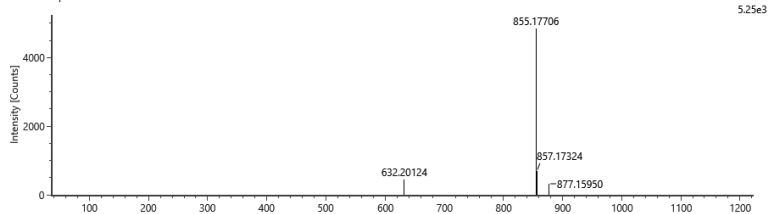

Item name: 2020-11-12-sample004  
Channel name: MSMS product : Set Mass(m/z)=855.1903 | RT=3.0494 mins | DT=7.73 ms

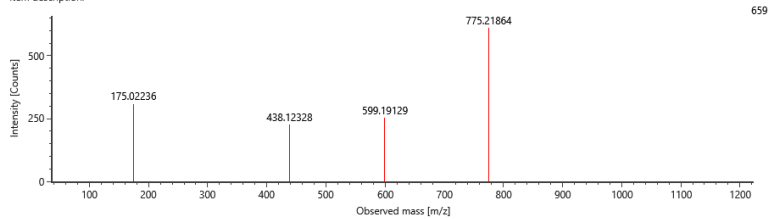

## DIA

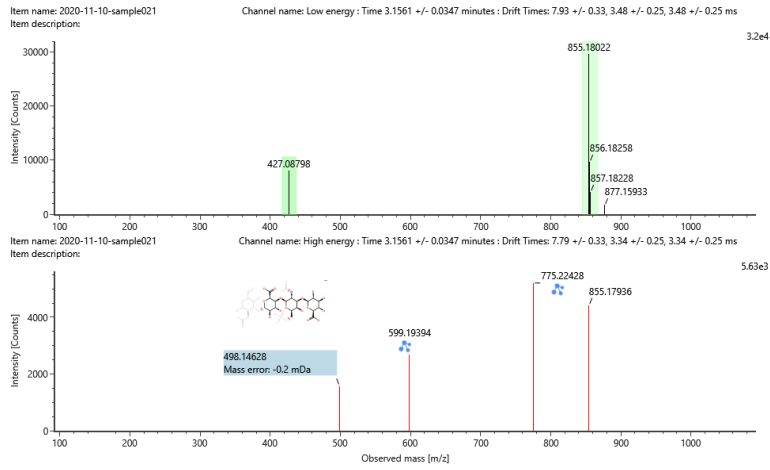

## Biomarker number: 6

### Annotation: no annotation

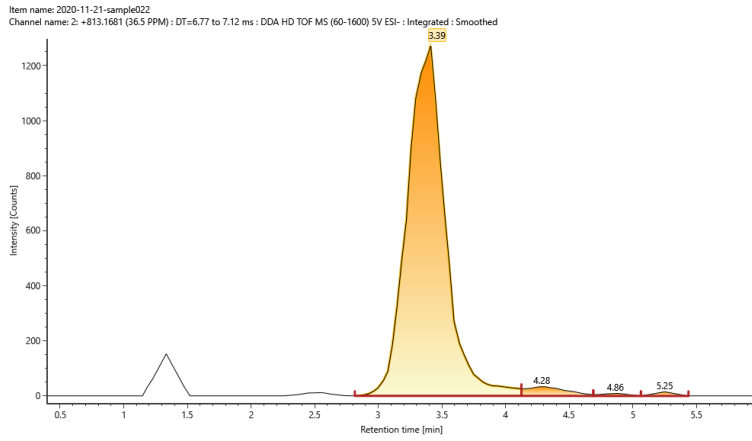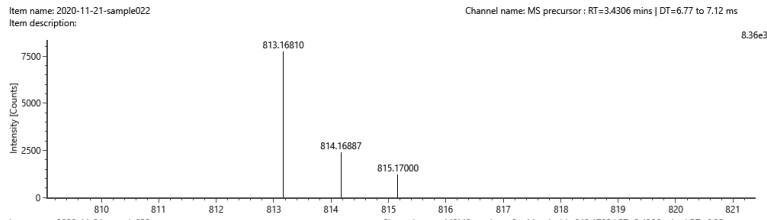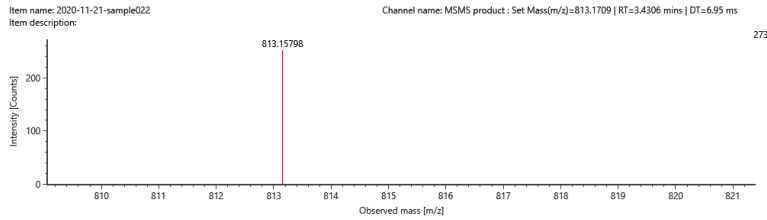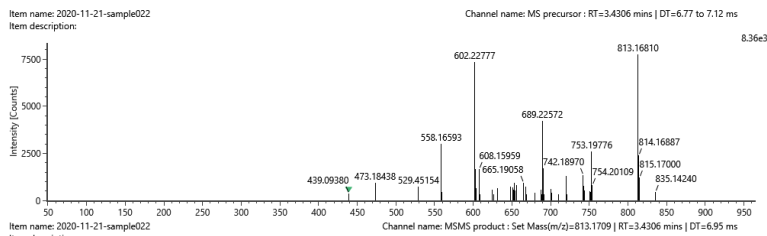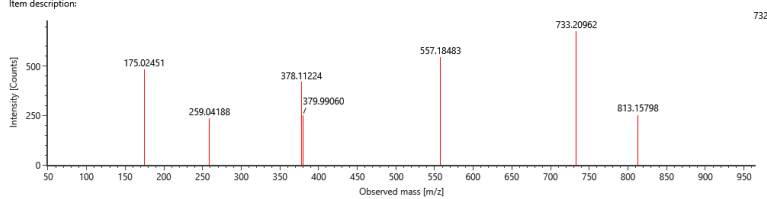

## DIA

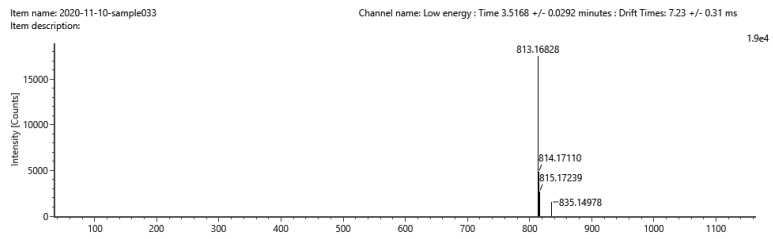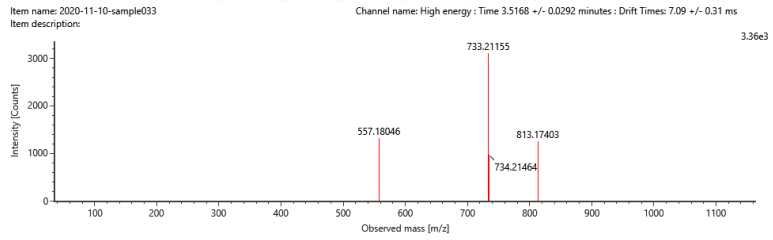

## Biomarker number: 7

### **Annotation: hex-s-hexNAc-s; Formula: C<sub>14</sub>H<sub>25</sub>NO<sub>17</sub>S<sub>2</sub>**

Item name: 2020-11-10-sample067-mps4-dda-002-moreCE  
Channel name: 2: +270.5202 (37.0 PPM) : DT=2.30 to 2.41 ms : DDA HD TOF MS (60-1600) 5V ESI- : Integrated : Smoothed

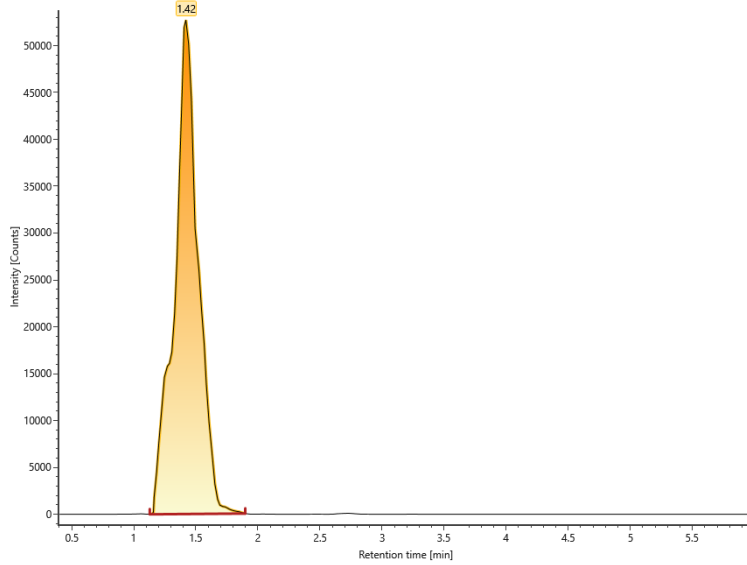

Item name: 2020-11-10-sample067-mps4-dda-002-moreCE  
Channel name: MS precursor : RT=1.4129 mins | DT=2.30 to 2.41 ms  
Item description:

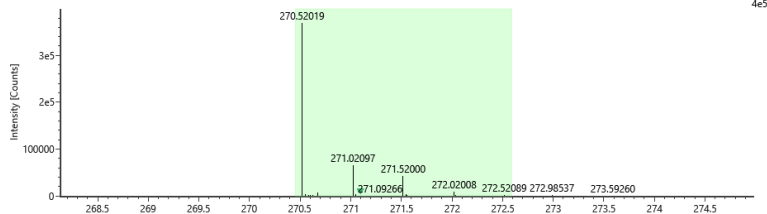

Item name: 2020-11-10-sample067-mps4-dda-002-moreCE  
Channel name: MSMS product : Set Mass(m/z)=270.5258 | RT=1.4129 mins | DT=2.35 ms  
Item description:

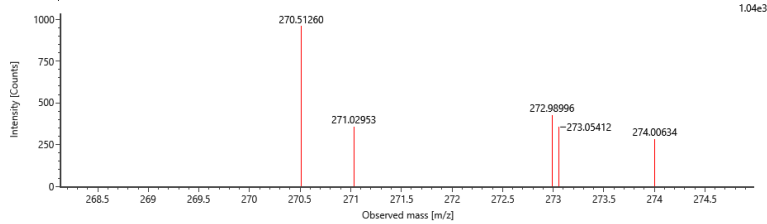



Detecting lysosomal storage disorders by glycomic profiling using liquid chromatography mass spectrometry  
Justin Mak and Tina M. Cowan

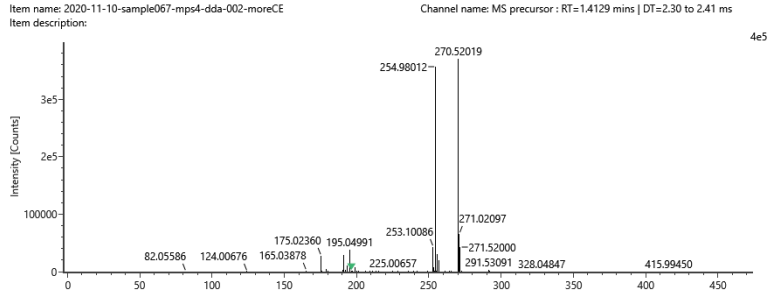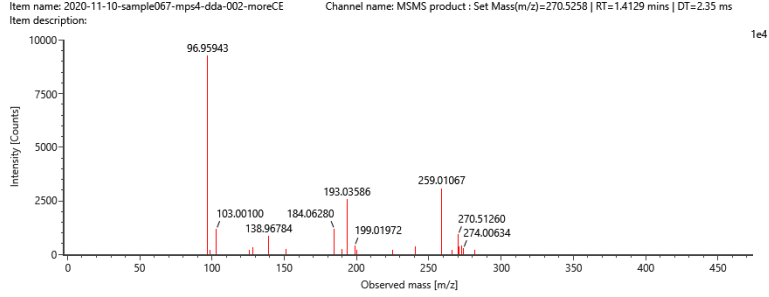

**DIA**

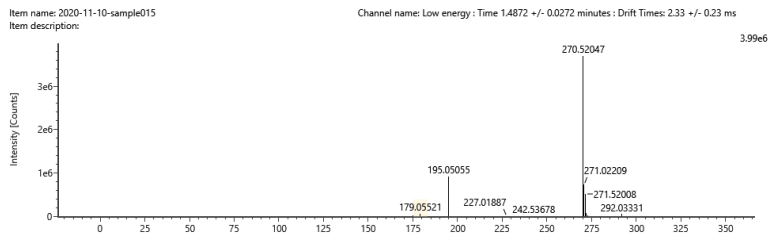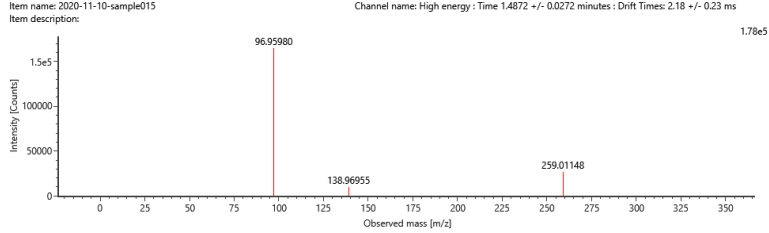

## Biomarker number: 8

**Annotation:** neuAC-hex-hexNAc-s; **Formula:** C<sub>25</sub>H<sub>42</sub>N<sub>2</sub>O<sub>22</sub>S

Item name: 2020-12-16-mps4a-dda-003  
Channel name: 2: +753.1843 (41.1 PPM) : DT=7.05 to 7.41 ms : DDA HD TOF MS (60-1600) 5V ESI- : Integrated : Smoothed

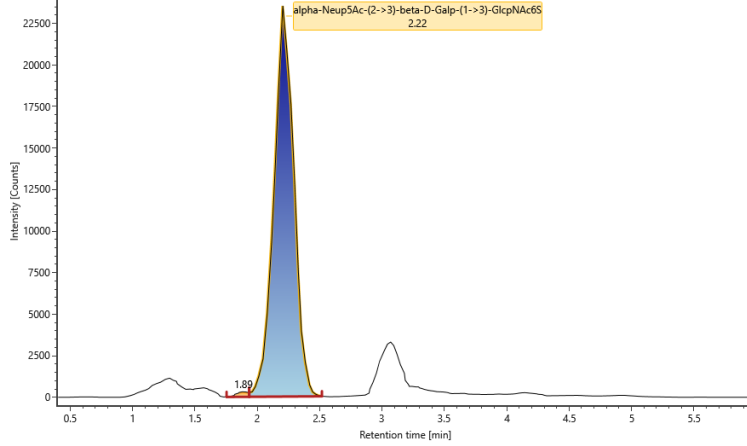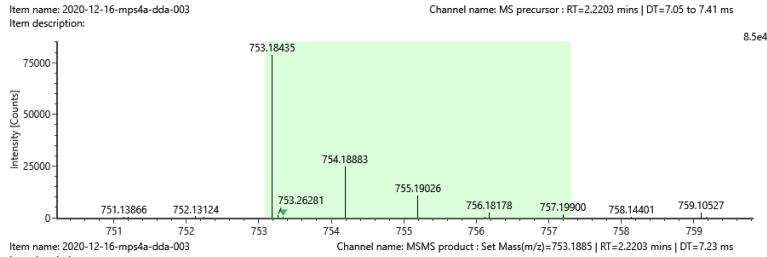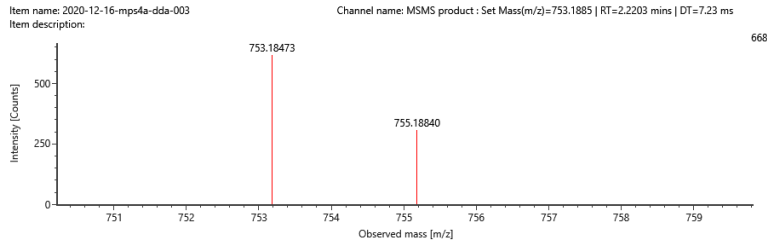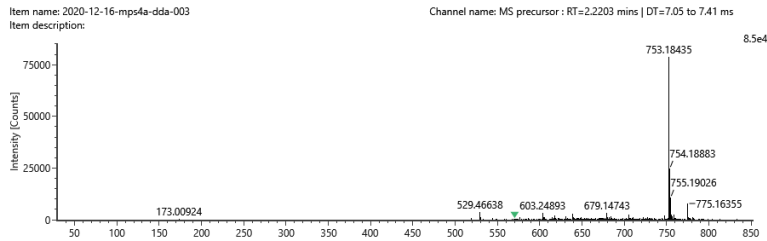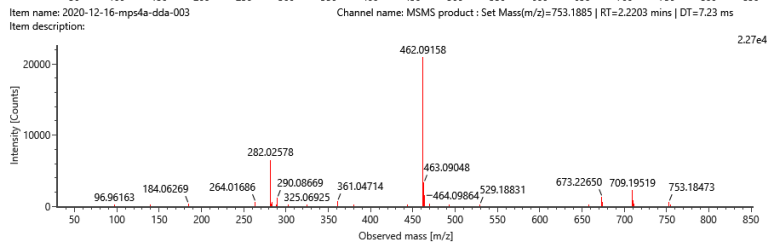

## DIA

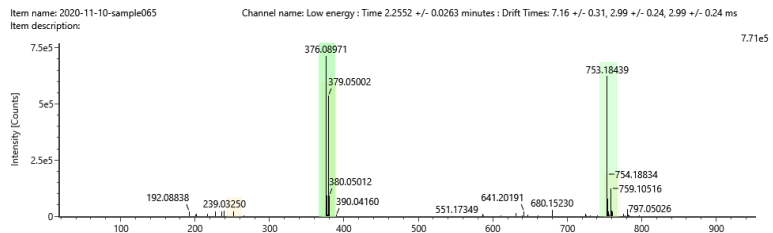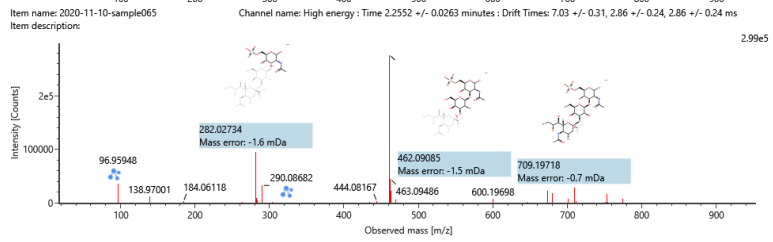

## Biomarker number: 9

**Annotation:** hexNAc-s; **Formula:** C<sub>8</sub>H<sub>15</sub>NO<sub>9</sub>S

Item name: 2020-11-10-sample067-mps4-dda-002-moreCE  
Channel name: 2: +300.0369 (37.0 PPM) : DT=3.37 to 3.54 ms : DDA HD TOF MS (60-1600) 5V ESI- : Integrated : Smoothed

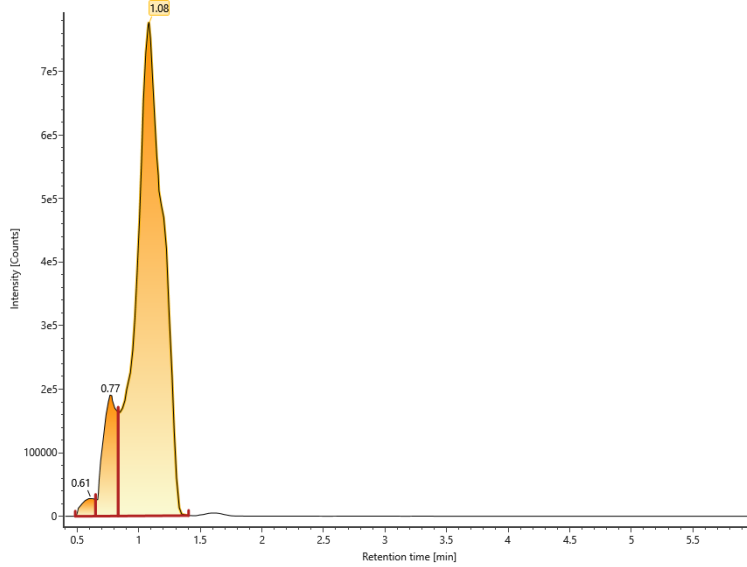

Item name: 2020-11-10-sample067-mps4-dda-002-moreCE  
Channel name: MS precursor : RT=1.1156 mins | DT=3.47 to 3.65 ms  
Item description:

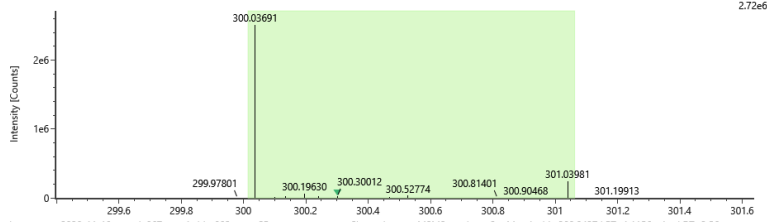

Item name: 2020-11-10-sample067-mps4-dda-002-moreCE  
Channel name: MSMS product : Set Mass(m/z)=300.0437 | RT=1.1156 mins | DT=3.56 ms  
Item description:

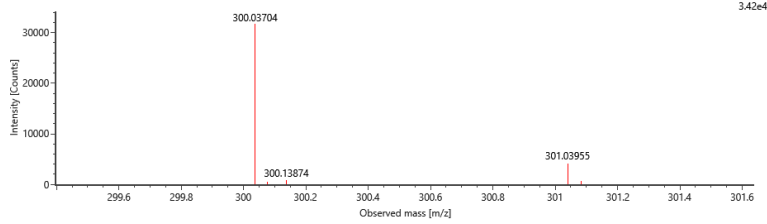

Detecting lysosomal storage disorders by glycomic profiling using liquid chromatography mass spectrometry  
Justin Mak and Tina M. Cowan

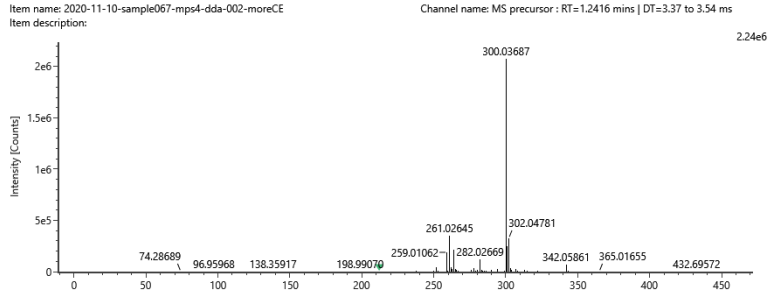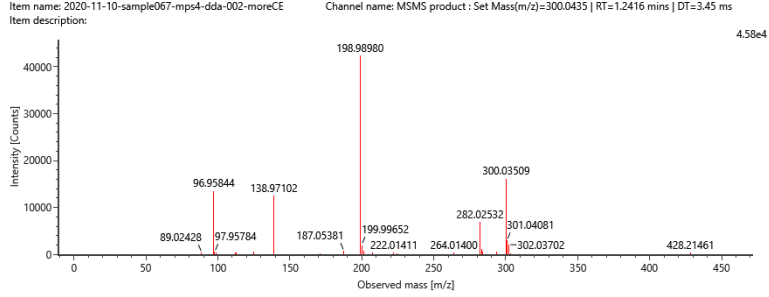

**DIA**

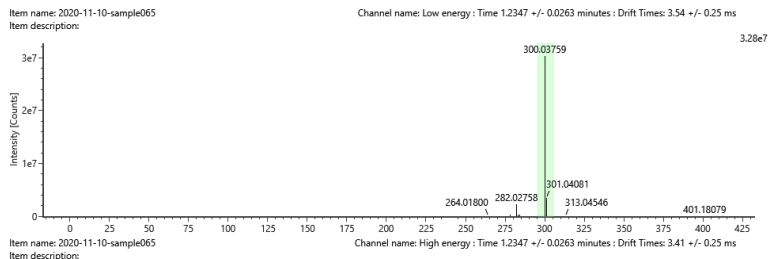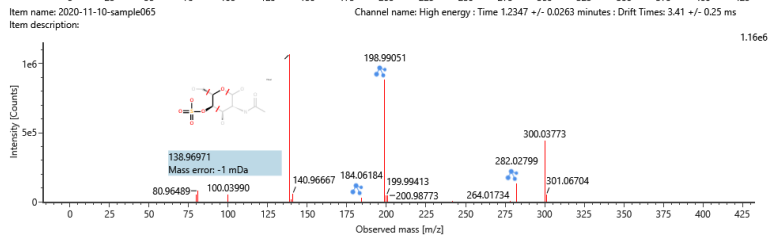

## Biomarker number: 10

**Annotation:** hex3-hexNAc2-s; **Formula:** C<sub>34</sub>H<sub>58</sub>N<sub>2</sub>O<sub>29</sub>S

### Neg ESI

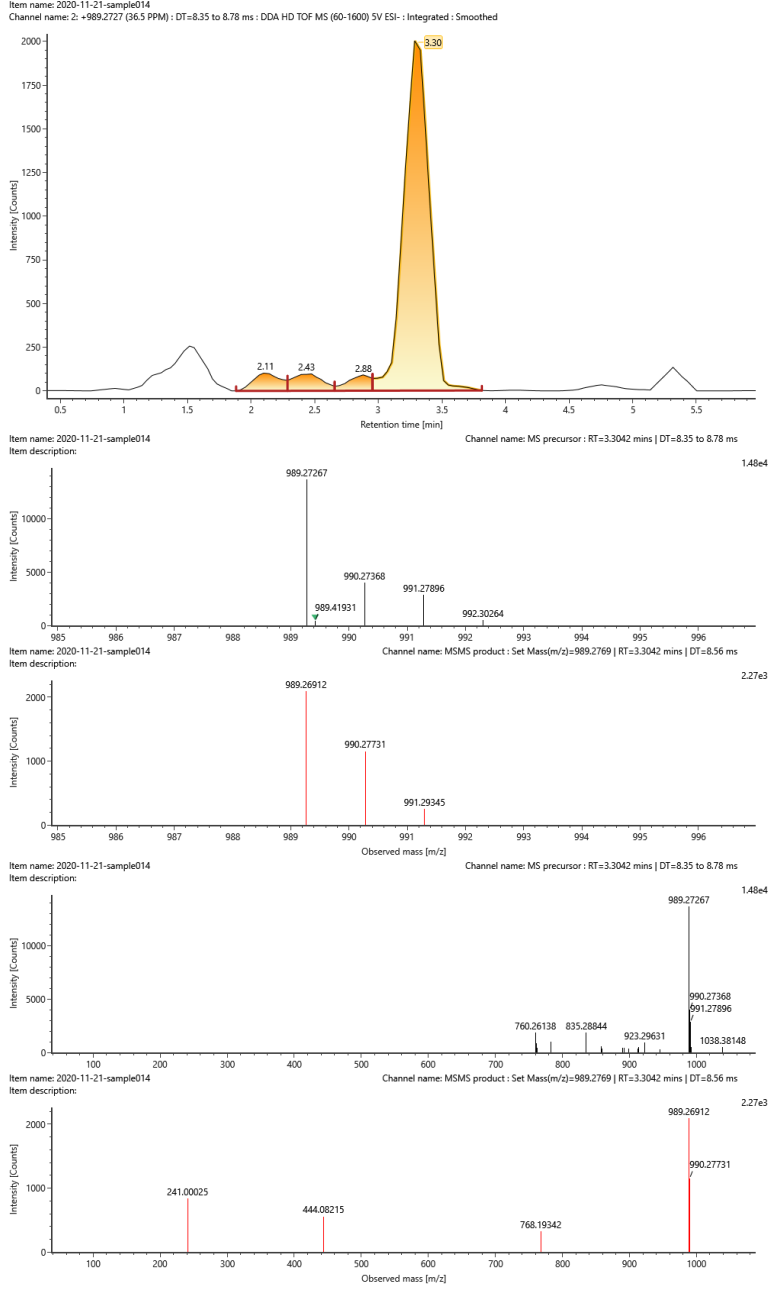

## Pos ESI

Item name: 2020-11-21-sample002-A2 mps4a-dda-002  
Channel name: 2 ->991.2933 (33.1 PPM) : DT=8.09 to 8.51 ms : DDA HD TOF MS (60-1600) 5V ESI+ : Integrated : Smoothed

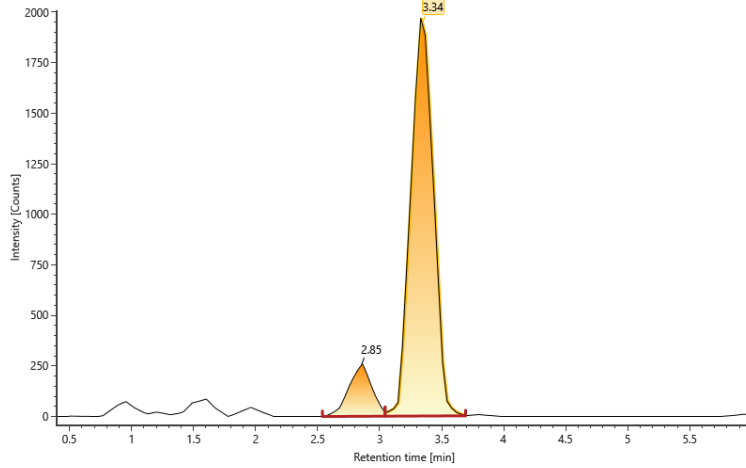

Item name: 2020-11-21-sample002-A2 mps4a-dda-002 Channel name: MS precursor : RT=3.3483 mins | DT=8.09 to 8.51 ms  
Item description:

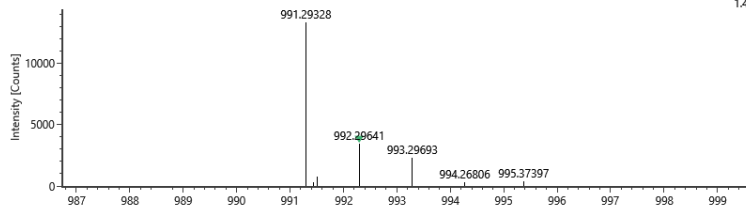

Item name: 2020-11-21-sample002-A2 mps4a-dda-002 Channel name: MSMS product : Set Mass(m/z)=991.2933 | RT=3.3483 mins | DT=8.30 ms  
Item description:

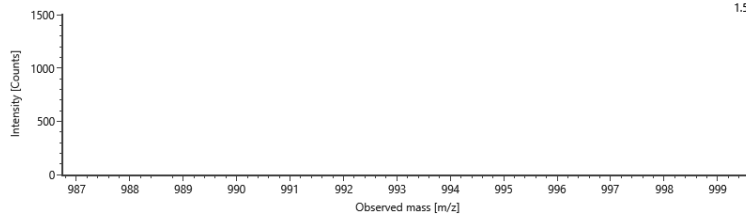

Item name: 2020-11-21-sample002-A2 mps4a-dda-003 Channel name: MS precursor : RT=3.2963 mins | DT=8.34 to 8.76 ms  
Item description:

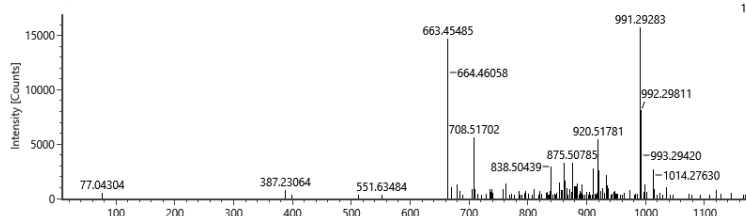

Item name: 2020-11-21-sample002-A2 mps4a-dda-003 Channel name: MSMS product : Set Mass(m/z)=991.2940 | RT=3.2963 mins | DT=8.55 ms  
Item description:

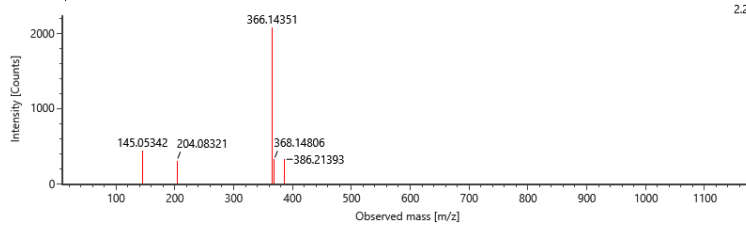

Uninformative DIA fragmentation spectra due to insufficient collision energy. Higher collision energies were used for the DDA acquisition.

## Biomarker number: 11

**Annotation:** hexNAc-s-UA-hexNAc-s; **Formula:** C<sub>22</sub>H<sub>36</sub>N<sub>2</sub>O<sub>23</sub>S<sub>2</sub>

### MPS 4 sample

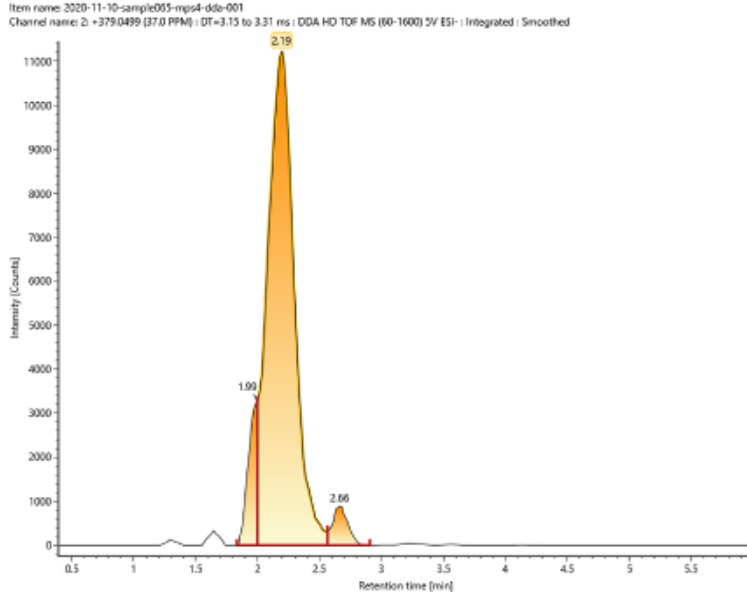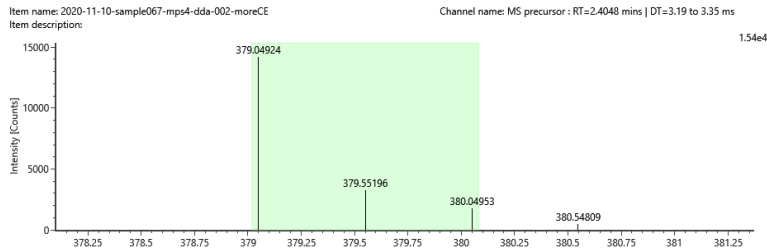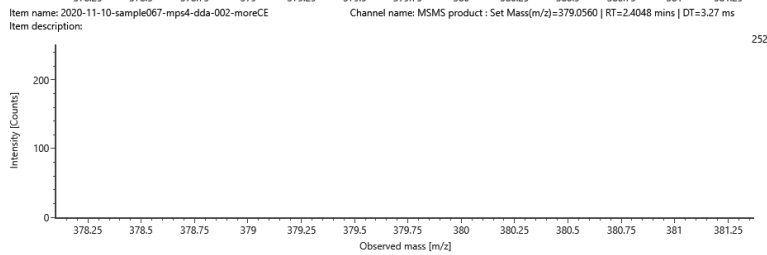



Detecting lysosomal storage disorders by glycomic profiling using liquid chromatography mass spectrometry  
Justin Mak and Tina M. Cowan

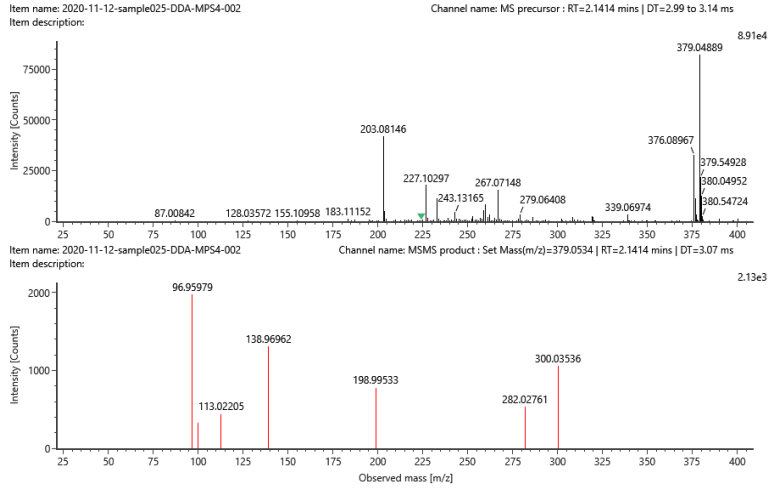

**DIA**

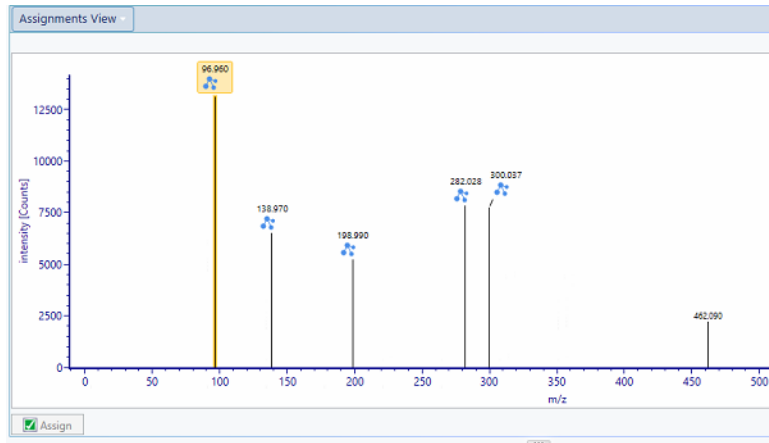

## MPS 6 sample

Item name: 2020-11-21-sample016

Channel name: 2 -> 379.0500 (36.5 PPM) : DT=3.16 to 3.32 ms : DDA HD TOF MS (60-1600) 5V ESI - Integrated : Smoothed

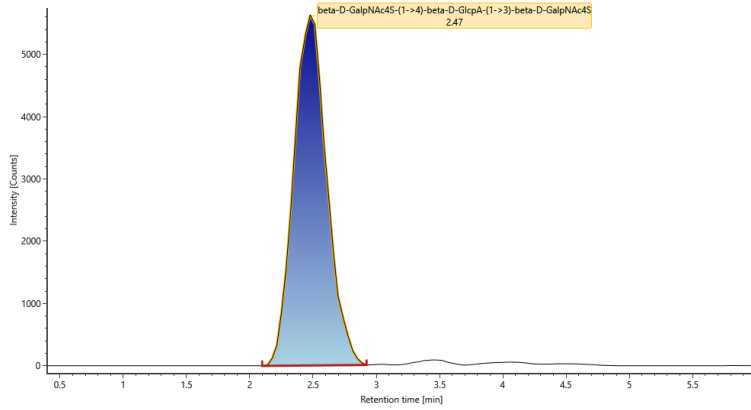

Item name: 2020-11-21-sample016

Item description:

Channel name: MS precursor: RT=2.4192 mins | DT=3.16 to 3.32 ms

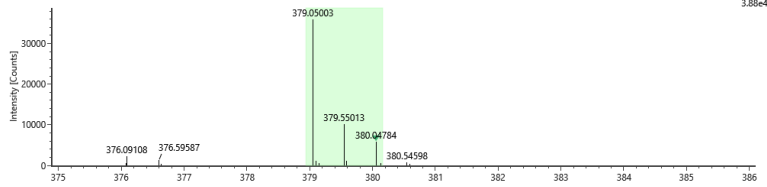

Item name: 2020-11-21-sample016

Item description:

Channel name: MSMS product: Set Mass(m/z)=379.0515 | RT=2.4192 mins | DT=3.24 ms

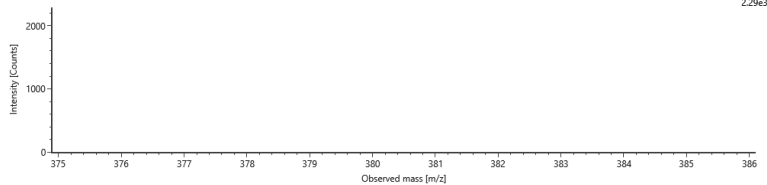

Item name: 2020-11-21-sample016

Item description:

Channel name: MS precursor: RT=2.4192 mins | DT=3.16 to 3.32 ms

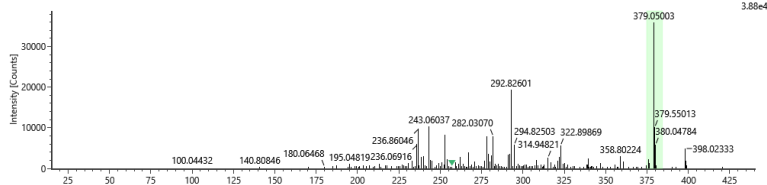

Item name: 2020-11-21-sample016

Item description:

Channel name: MSMS product: Set Mass(m/z)=379.0515 | RT=2.4192 mins | DT=3.24 ms

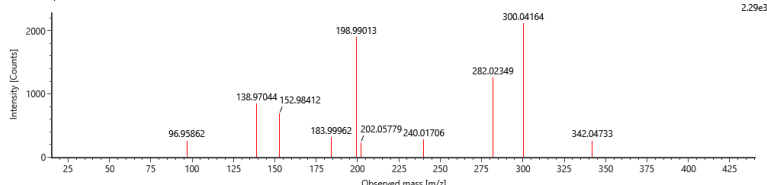

## Biomarker number: 12

**Annotation:** hex3-hexNAc2; **Formula:** C<sub>34</sub>H<sub>58</sub>N<sub>2</sub>O<sub>26</sub>

### Pos ESI

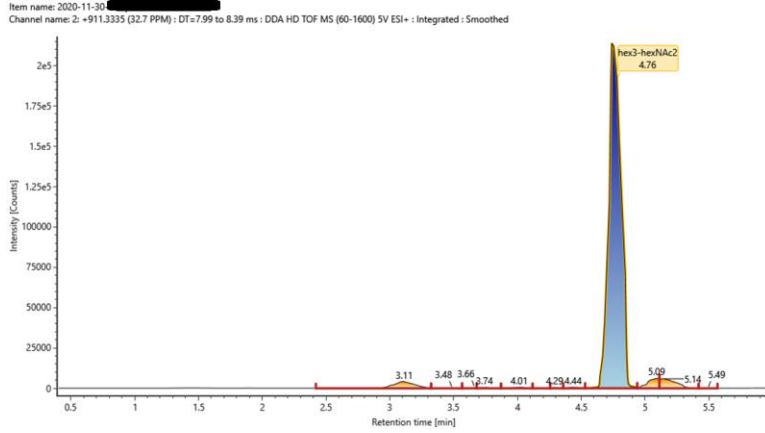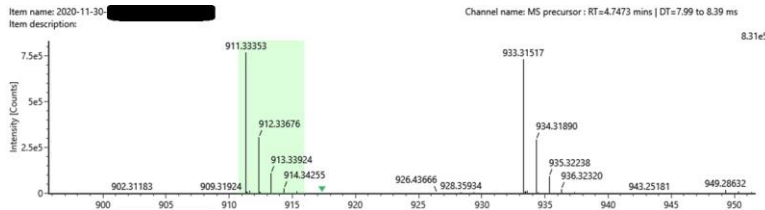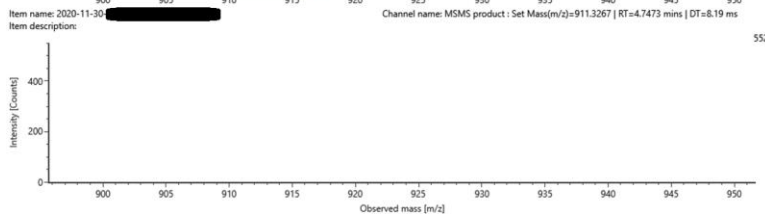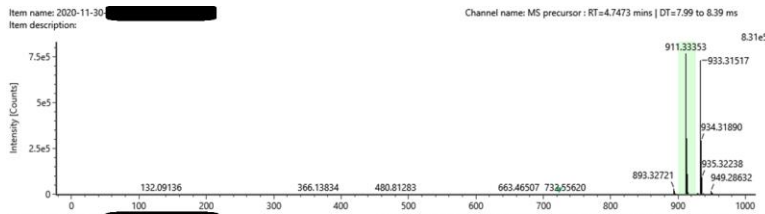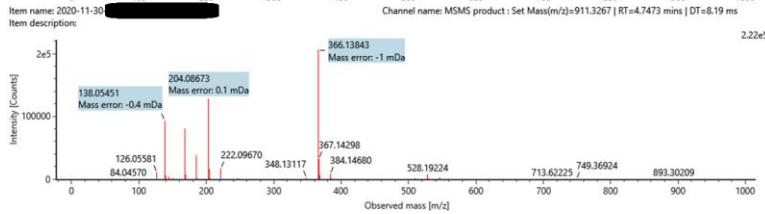

## DIA

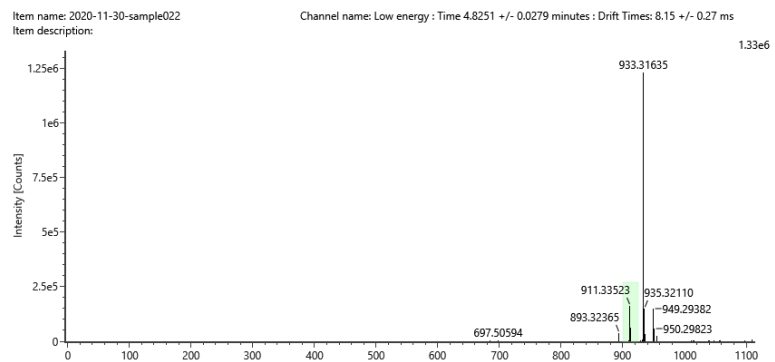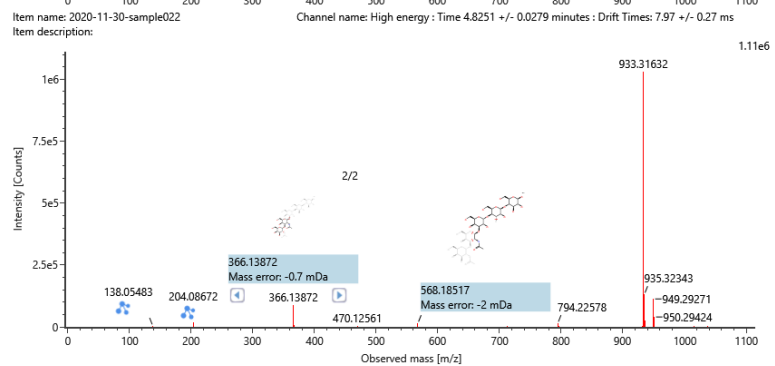

## Biomarker number: 13

**Annotation:** hex4-hexNAc2; **Formula:** C40H68N2O31

### Pos ESI

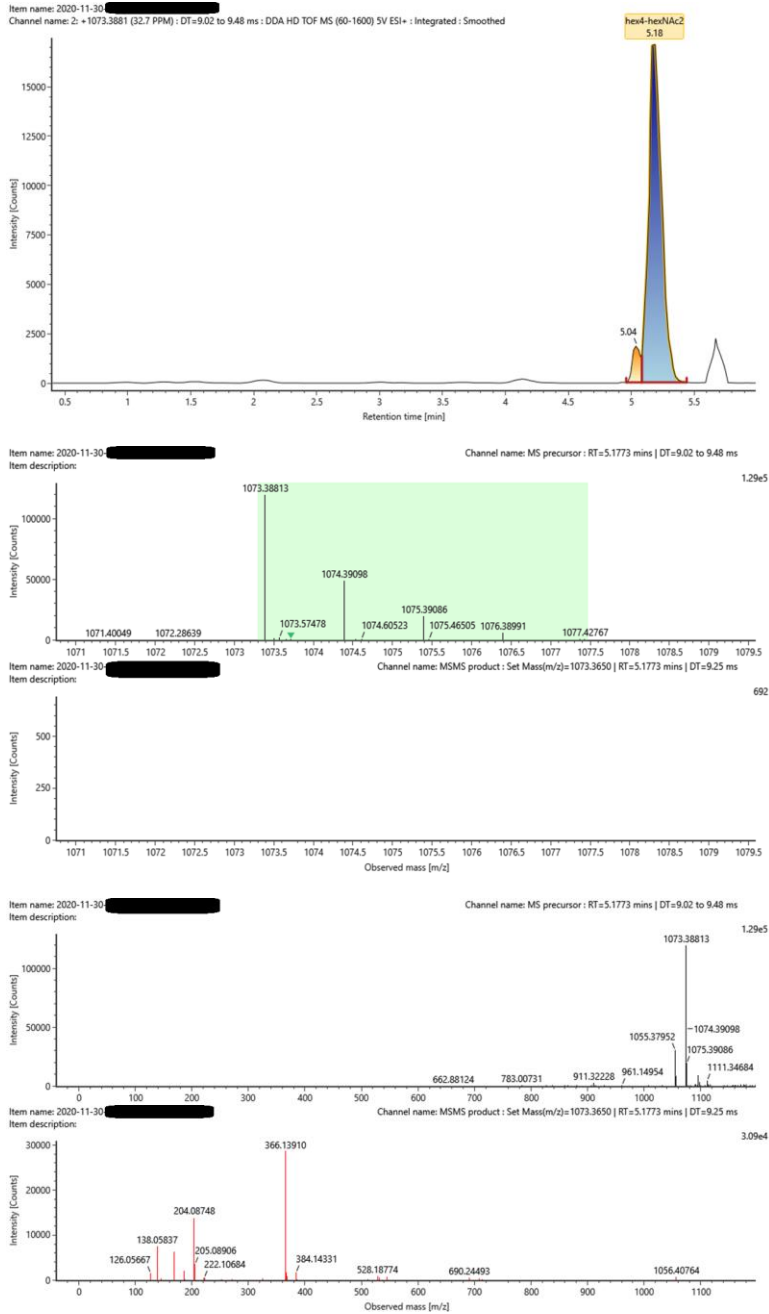

Uninformative DIA fragmentation spectra due to insufficient collision energy. Higher collision energies were used for the DDA acquisition.

## Biomarker number: 14

**Annotation:** hex5-hexNAc3; **Formula:** C<sub>54</sub>H<sub>91</sub>N<sub>3</sub>O<sub>41</sub>

### Pos ESI

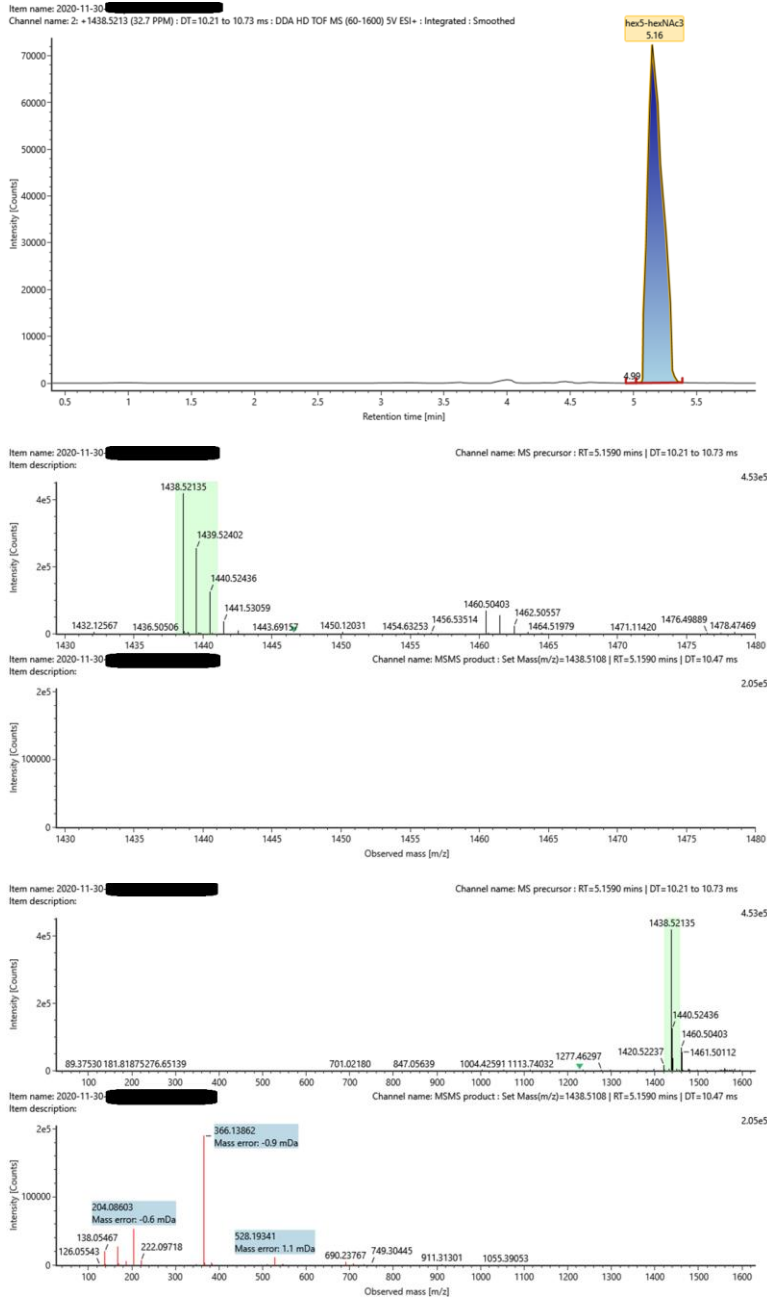

Uninformative DIA fragmentation spectra due to insufficient collision energy. Higher collision energies were used for the DDA acquisition.

## Biomarker number: 15

### Annotation: hexNAc-s; Formula: C<sub>8</sub>H<sub>15</sub>NO<sub>9</sub>S

Item name: 2020-11-21-sample016  
Channel name: 2: +300.0394 (36.5 PPM) : DT=3.43 to 3.61 ms : DDA HD TOF MS (60-1600) 5V ESI- : Integrated : Smoothed

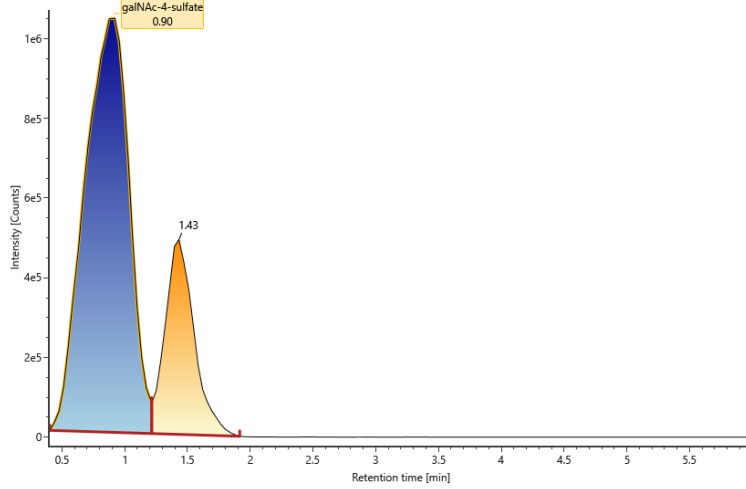

Item name: 2020-11-21-sample016  
Channel name: MS precursor : RT=0.6507 mins | DT=3.43 to 3.61 ms  
Item description:

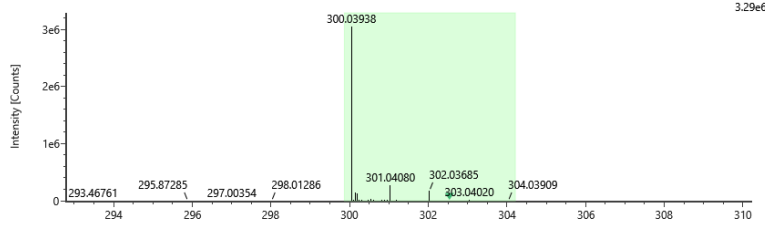

Item name: 2020-11-21-sample016  
Channel name: MSMS product : Set Mass(m/z)=300.0412 | RT=0.6507 mins | DT=3.52 ms  
Item description:

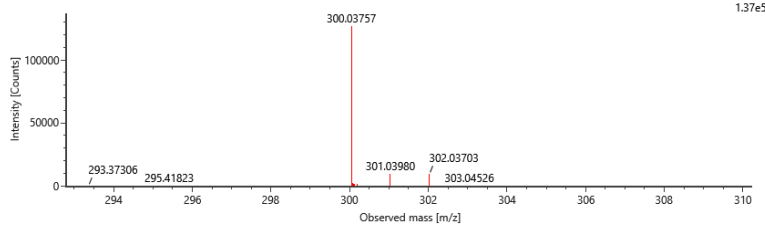

Item name: 2020-11-21-sample016  
Channel name: MS precursor : RT=0.6507 mins | DT=3.43 to 3.61 ms  
Item description:

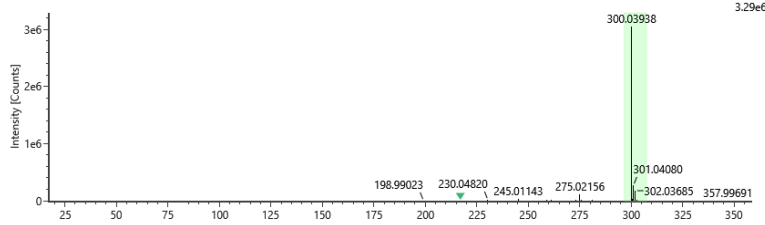

Item name: 2020-11-21-sample016  
Channel name: MSMS product : Set Mass(m/z)=300.0412 | RT=0.6507 mins | DT=3.52 ms  
Item description:

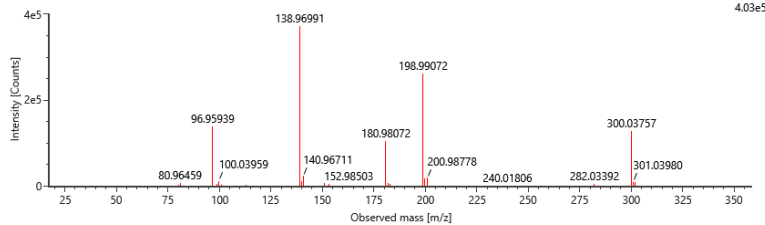

## DIA

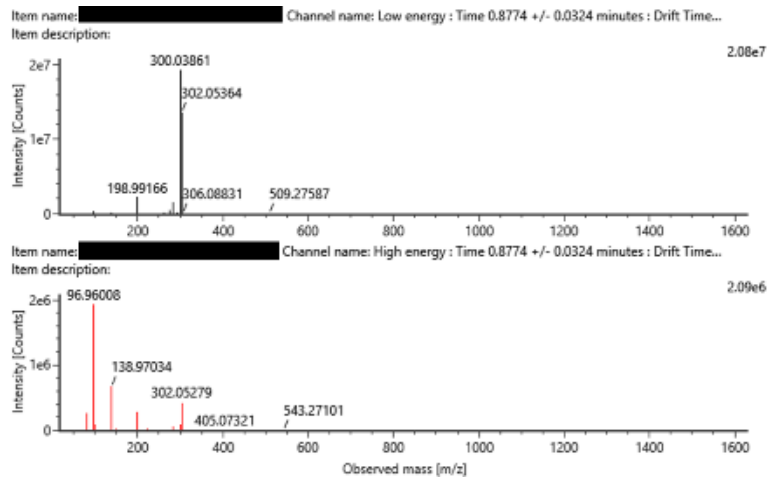



## Biomarker number: 16

**Annotation:** hexNAc-disulfate; **Formula:** C<sub>8</sub>H<sub>15</sub>NO<sub>12</sub>S<sub>2</sub>

Item name: 2020-11-21-sample016  
Channel name: 2 - 189.4936 (36.5 PPM) : DT=1.48 to 1.58 ms : DDA HD TOF MS (60-1600) 5V ESI- : Integrated : Smoothed

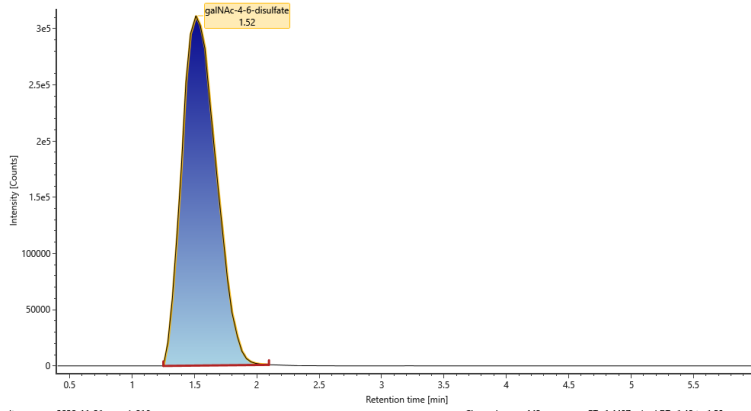

Item name: 2020-11-21-sample016  
Channel name: MS precursor : RT=1.4487 mins | DT=1.48 to 1.58 ms  
Item description:

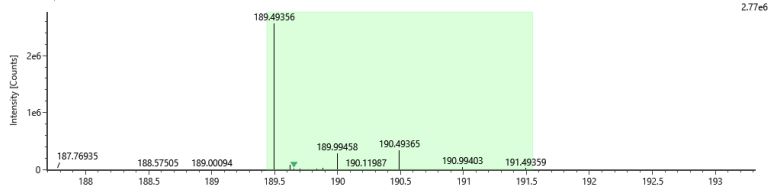

Item name: 2020-11-21-sample016  
Channel name: MSMS product : Set Mass(m/z)=189.4948 | RT=1.4487 mins | DT=1.53 ms  
Item description:

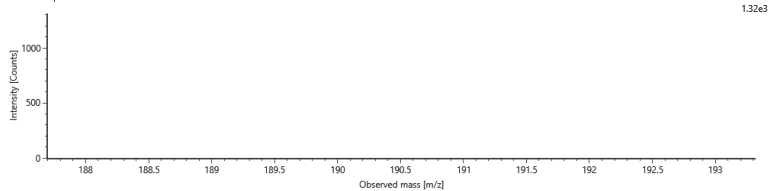

Item name: 2020-11-21-sample016  
Channel name: MS precursor : RT=1.4487 mins | DT=1.48 to 1.58 ms  
Item description:

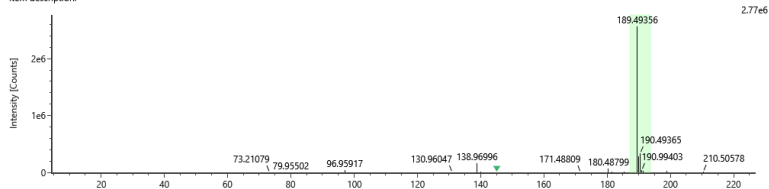

Item name: 2020-11-21-sample016  
Channel name: MSMS product : Set Mass(m/z)=189.4948 | RT=1.4487 mins | DT=1.53 ms  
Item description:

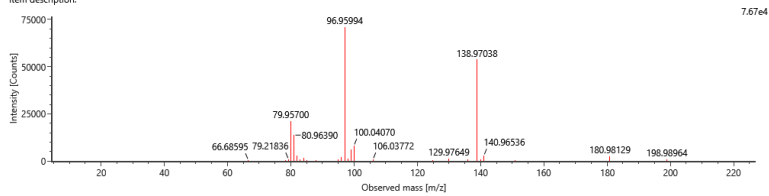

## DIA

Item name: 2020-11-10-sample072 Channel name: Low energy : Time 1.3769 +/- 0.0258 minutes : Drift Times: 1.49 +/- 0.21, 1.49 +/- 0.21, 4.07 +/- 0.0...  
Item description:

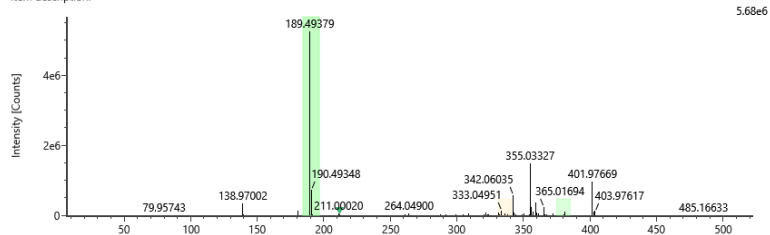

Item name: 2020-11-10-sample072 Channel name: High energy : Time 1.3769 +/- 0.0258 minutes : Drift Times: 1.34 +/- 0.21, 1.34 +/- 0.21, 3.92 +/- 0.0...  
Item description:

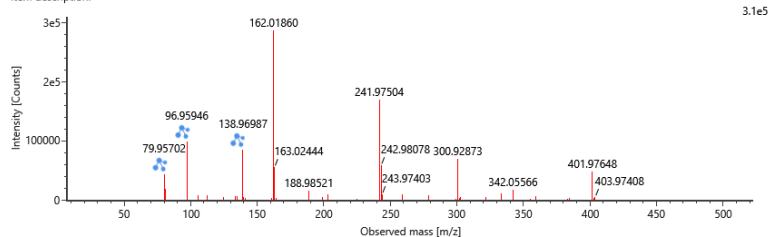

## Biomarker number: 17

**Annotation:** hexNAc-s-UA; **Formula:** C<sub>14</sub>H<sub>23</sub>NO<sub>15</sub>S

### Left peak

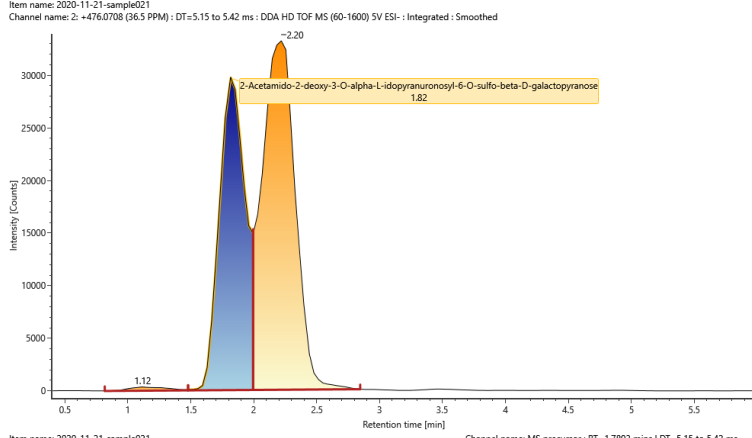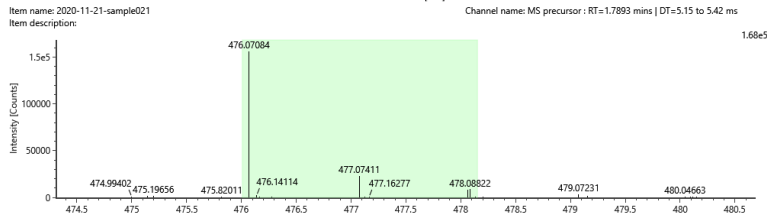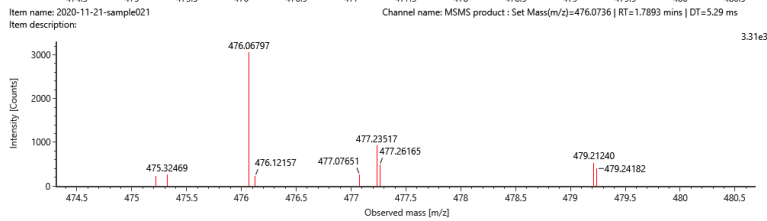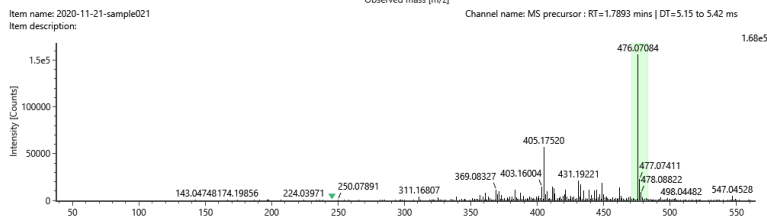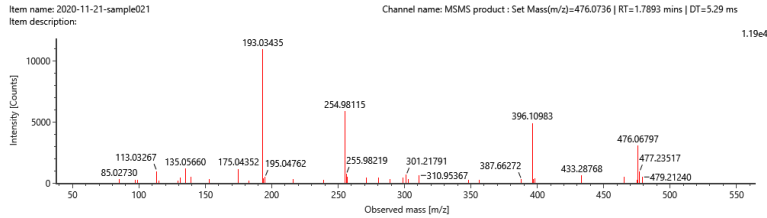

## DIA

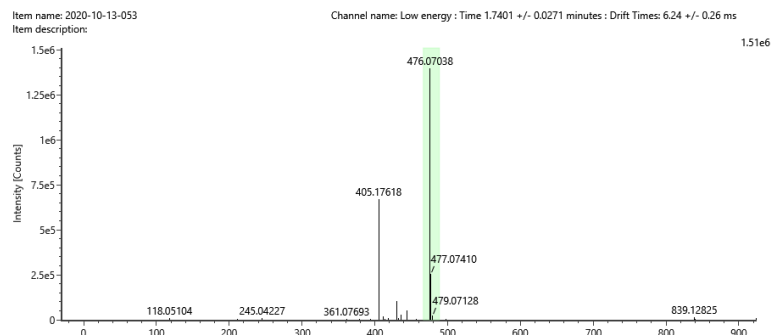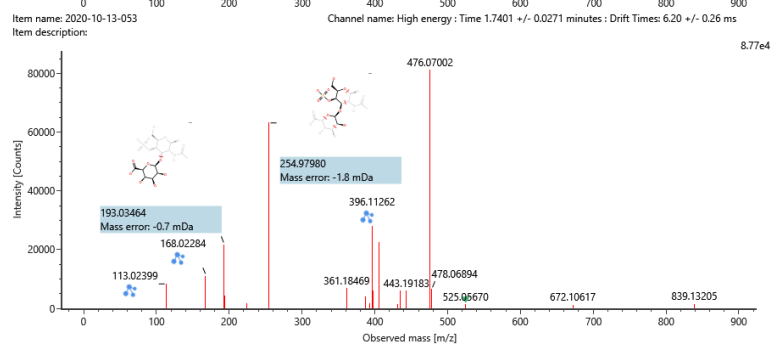

## Right peak (note the different fragmentation pattern)

Item name: 2020-11-21-sample021

Channel name: 2 - 476.0706 (36.5 PPM) : DT=5.06 to 5.32 ms : DDA HD TOF MS (60-1600) 5V ESI+ : Integrated : Smoothed

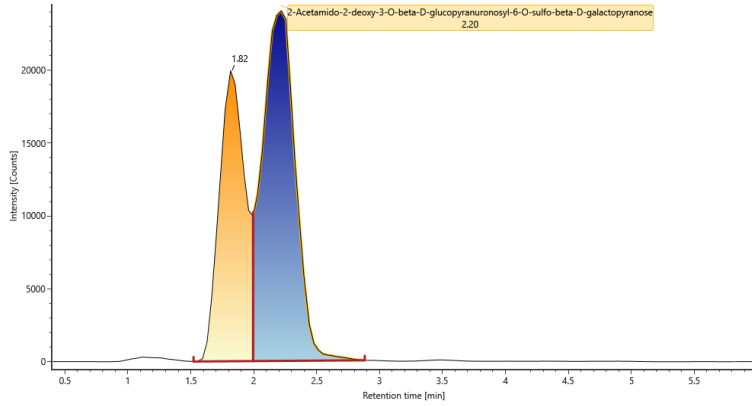

Item name: 2020-11-21-sample021

Item description:

Channel name: MS precursor: RT=2.2764 mins | DT=5.06 to 5.32 ms

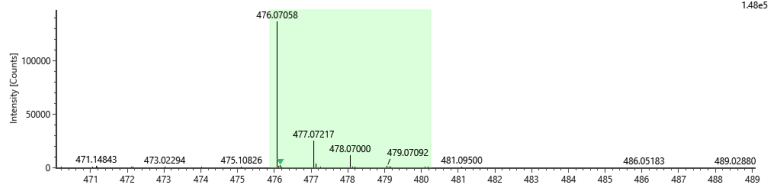

Item name: 2020-11-21-sample021

Item description:

Channel name: MSMS product: Set Mass(m/z)=476.0743 | RT=2.2764 mins | DT=5.19 ms

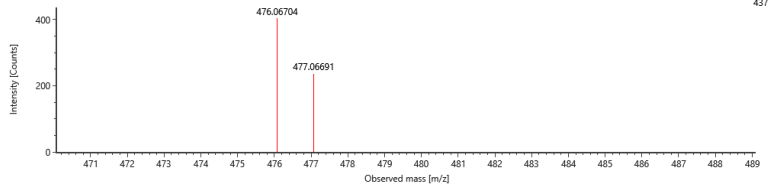

Item name: 2020-11-21-sample021

Item description:

Channel name: MS precursor: RT=2.2764 mins | DT=5.06 to 5.32 ms

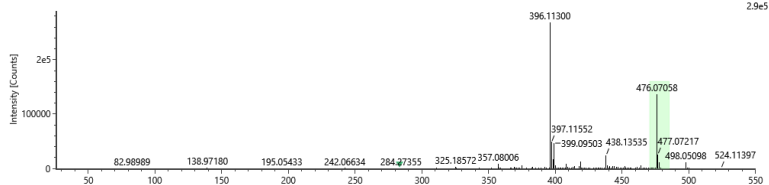

Item name: 2020-11-21-sample021

Item description:

Channel name: MSMS product: Set Mass(m/z)=476.0743 | RT=2.2764 mins | DT=5.19 ms

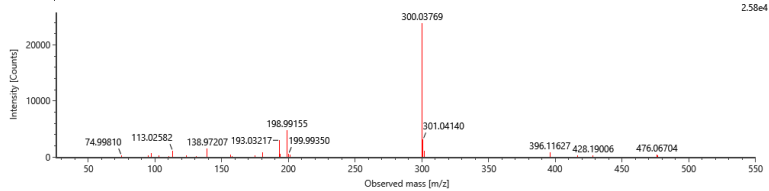

## DIA

Item name: 2020-10-13-053 Channel name: Low energy : Time 1.9289 +/- 0.0271 minutes : Drift Times: 6.03 +/- 0.26, 3.24 +/- 0.23, 3.24 +/- 0.23 ms  
Item description:

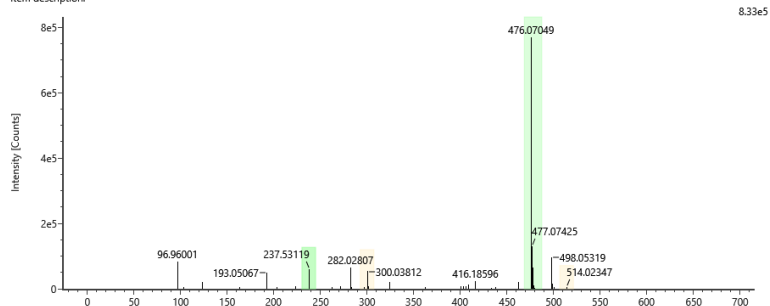

Item name: 2020-10-13-053 Channel name: High energy : Time 1.9289 +/- 0.0271 minutes : Drift Times: 5.99 +/- 0.26, 3.21 +/- 0.23, 3.21 +/- 0.23 ms  
Item description:

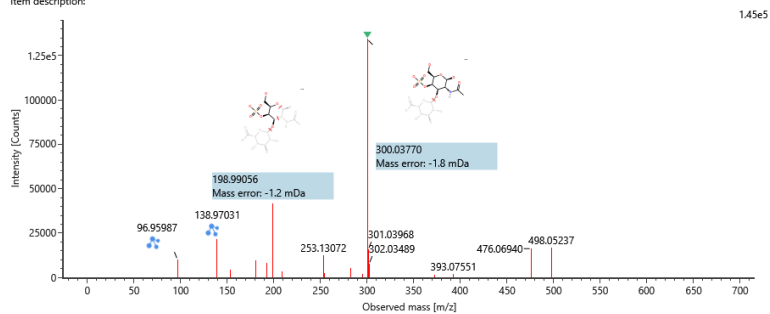

## Biomarker number: 18

### **Annotation:** hexNAc-UA; **Formula:** C14H23NO12

Item name: 2020-11-21-sample021  
Channel name: 2 - +396.1144 (36.5 PPM) : DT=4.63 to 4.86 ms : DDA HD TOF MS (60-1600) 5V ESI- : Integrated : Smoothed

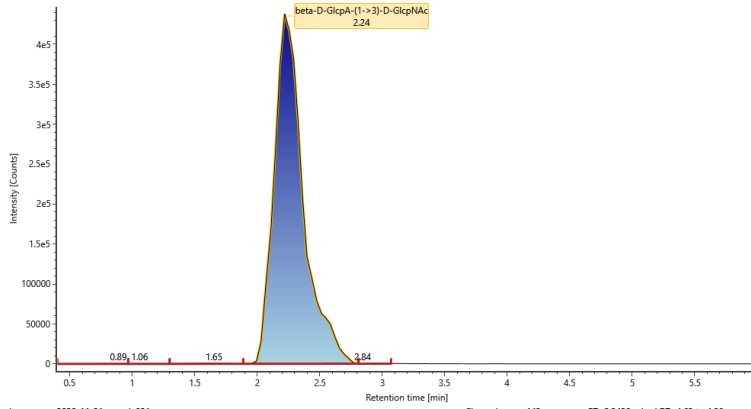

Item name: 2020-11-21-sample021  
Channel name: MS precursor : RT=2.3430 mins | DT=4.63 to 4.86 ms  
Item description:

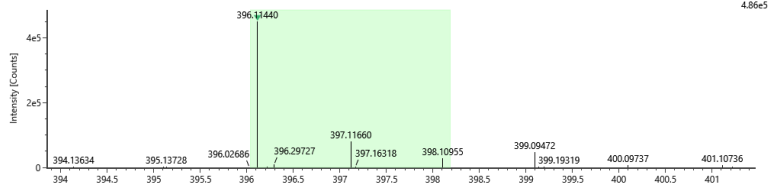

Item name: 2020-11-21-sample021  
Channel name: MSMS product : Set Mass(m/z)=396.1168 | RT=2.3430 mins | DT=4.74 ms  
Item description:

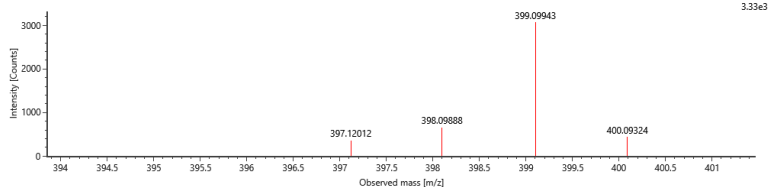

Item name: 2020-11-21-sample021  
Channel name: MS precursor : RT=2.3430 mins | DT=4.63 to 4.86 ms  
Item description:

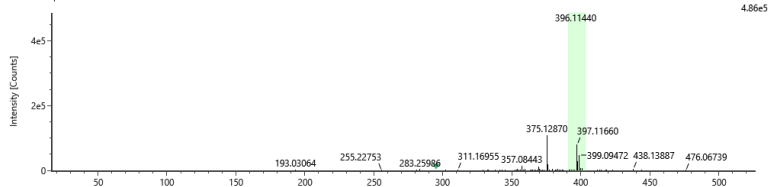

Item name: 2020-11-21-sample021  
Channel name: MSMS product : Set Mass(m/z)=396.1168 | RT=2.3430 mins | DT=4.74 ms  
Item description:

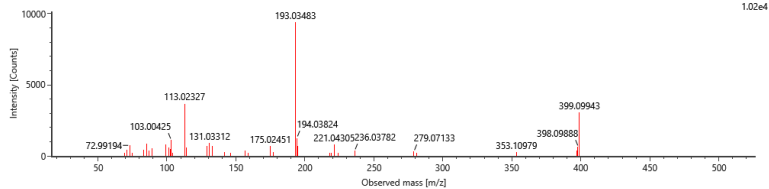

## DIA

Item name: 2020-11-10-sample026 Channel name: Low energy : Time 2.1497 +/- 0.0293 minutes : Drift Times: 4.67 +/- 0.27 ms  
Item description:

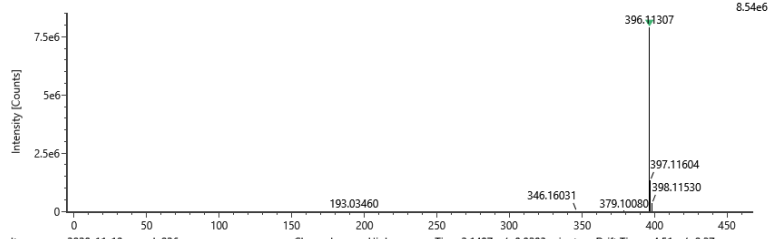

Item name: 2020-11-10-sample026 Channel name: High energy : Time 2.1497 +/- 0.0293 minutes : Drift Times: 4.51 +/- 0.27 ms  
Item description:

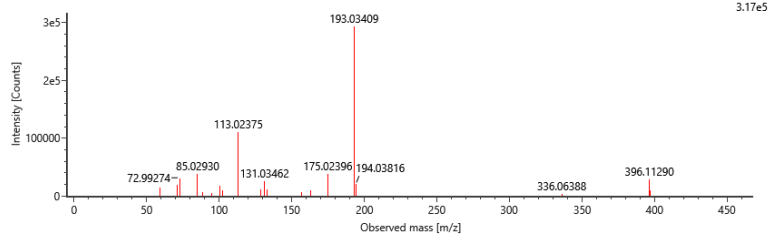



## Biomarker number: 19

**Annotation:** hexNAc-UA-hexNAc; **Formula:** C<sub>22</sub>H<sub>36</sub>N<sub>2</sub>O<sub>17</sub>

Item name: 2020-11-10-sample026-mps7-dda-001

Channel name: 2: +599.1903 (37.0 PPM) : DT=6.66 to 7.00 ms : DDA HD TOF MS (60-1600) 5V ESI- : Integrated : Smoothed

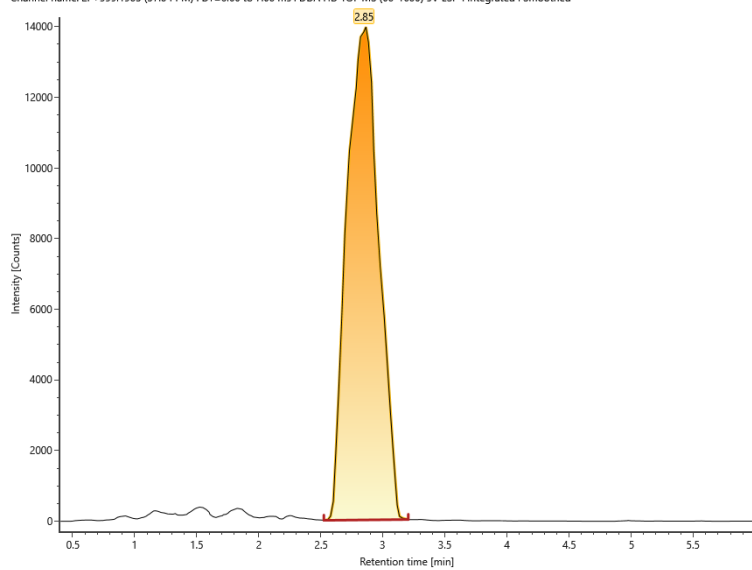

Item name: 2020-11-10-sample026-mps7-dda-002

Channel name: MS precursor : RT=2.8163 mins | DT=6.54 to 6.88 ms

Item description:

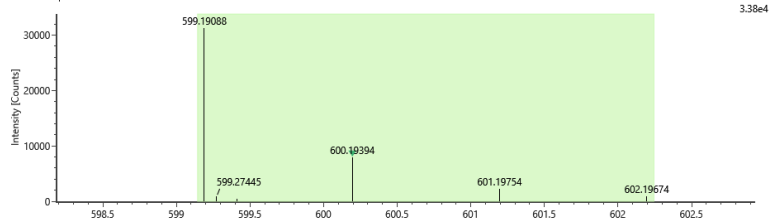

Item name: 2020-11-10-sample026-mps7-dda-002

Channel name: MSMS product : Set Mass(m/z)=599.2050 | RT=2.8163 mins | DT=6.71 ms

Item description:

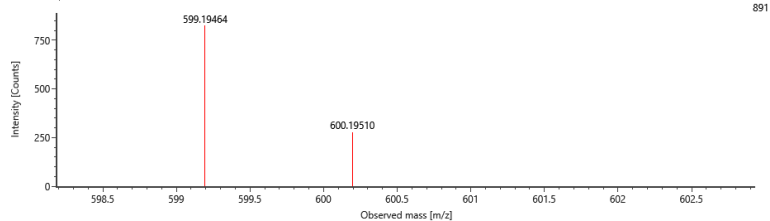

Detecting lysosomal storage disorders by glycomic profiling using liquid chromatography mass spectrometry  
Justin Mak and Tina M. Cowan

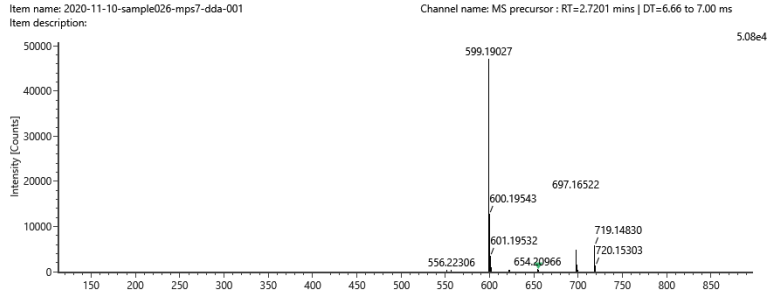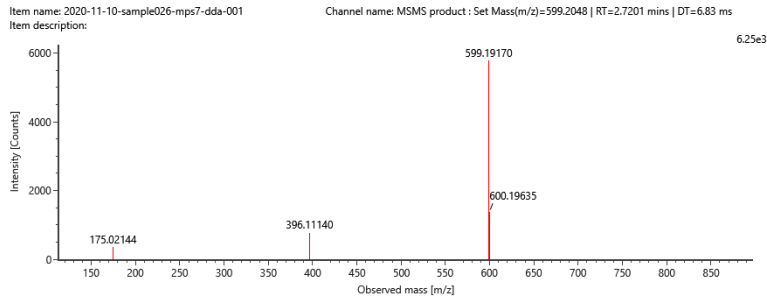

## DIA

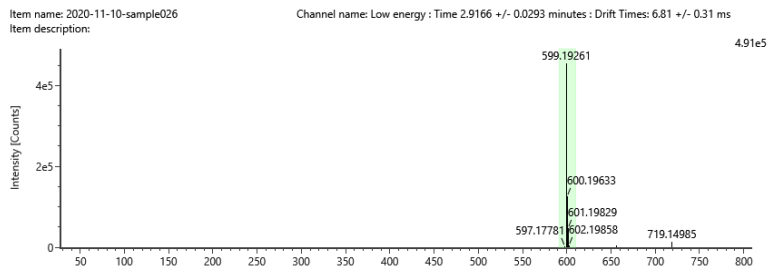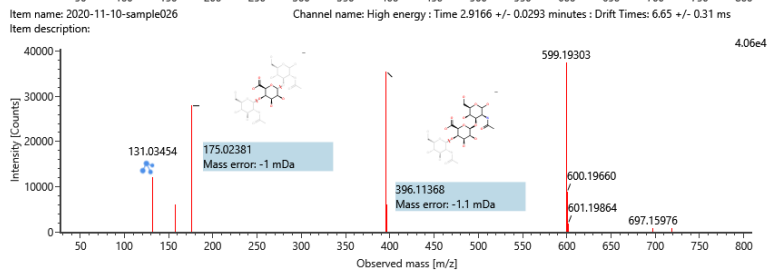

Biomarker number: 20

**Annotation: neuAC-hex3-hexNAc2; Formula: C45H75N3O34**

**Pos ESI**

Item name: 2020-11-30-sample051  
Channel name: 2: +1202.4310 (32.7 PPM) : DT=9.22 to 9.69 ms : DDA HD TOF MS (60-1450) 5V ESI+ : Integrated : Smoothed

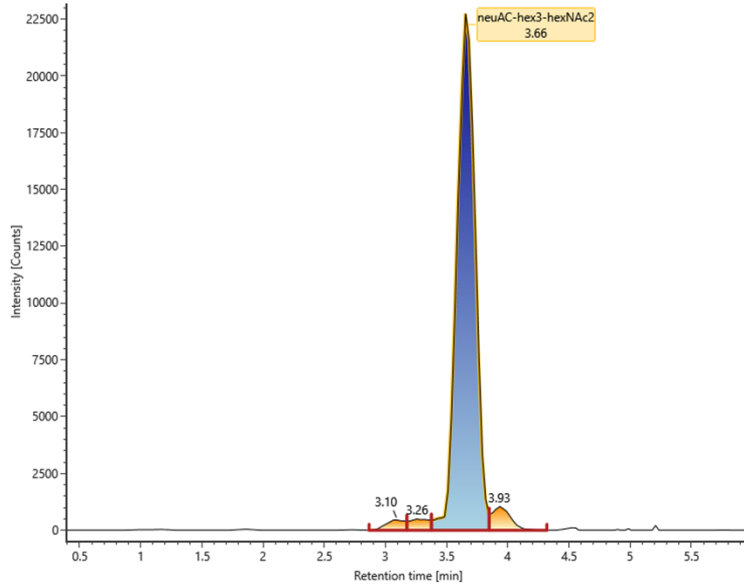

Item name: 2020-11-30-sample051  
Channel name: MS precursor : RT=3.6631 mins | DT=9.22 to 9.69 ms  
Item description:

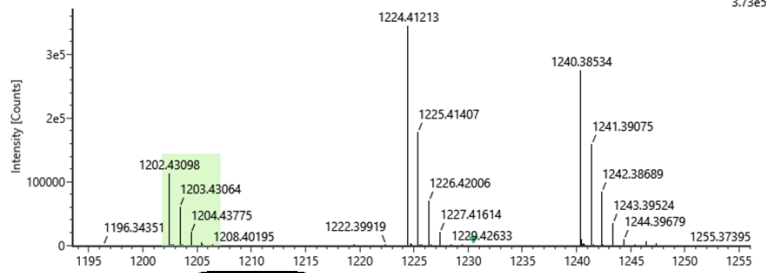

Item name: 2020-11-30-sample051  
Channel name: MSMS product : Set Mass(m/z)=1202.4359 | RT=3.6631 mins | ...  
Item description:

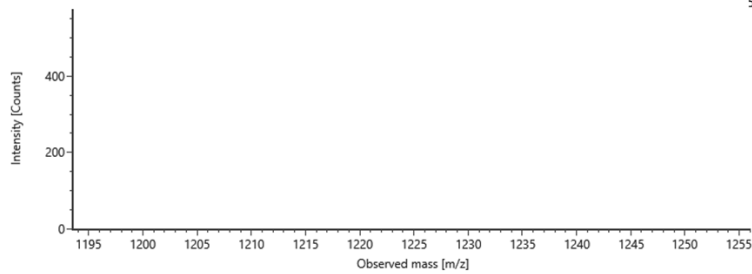

Detecting lysosomal storage disorders by glycomic profiling using liquid chromatography mass spectrometry  
Justin Mak and Tina M. Cowan

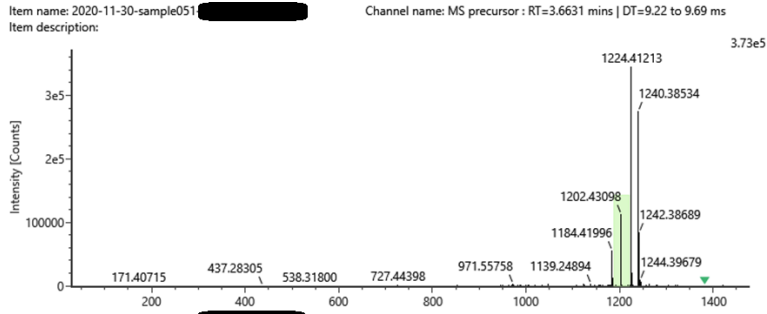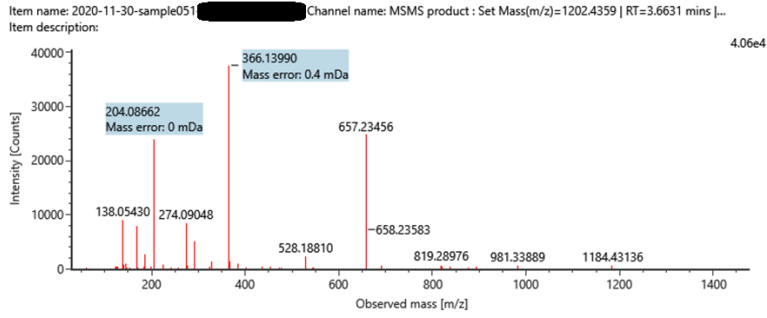

## Figure S4. Chromatographic resolution of two ion features both annotated as hexNAc-s that can differentiate MPS 4a from MPS 6.

Representative extracted ion chromatograms showing retention time differences between two ion features annotated as hexNAc-s (300.0384 m/z; ESI-) for A) MPS 4a and B) MPS 6. Urine samples were analyzed on the Vion using DDA with ion-mobility enabled. Corresponding spectra are included. There were no appreciable differences in drift time. To control for retention time shifts due to mobile phase or batch effects, the samples were acquired consecutively without system changes.

### A) MPS 4a urine

Drift Time = 3.45-3.62 ms

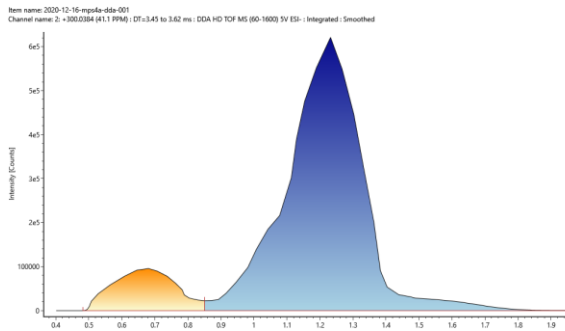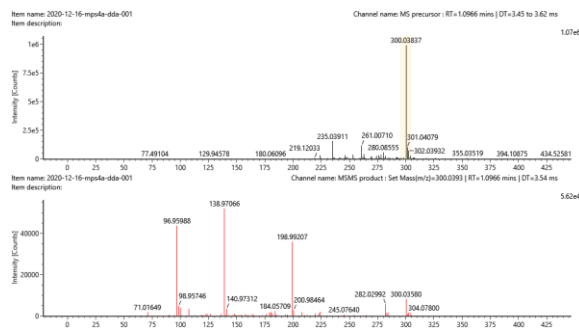

### B) MPS 6 urine

Drift Time = 3.51-3.69 ms

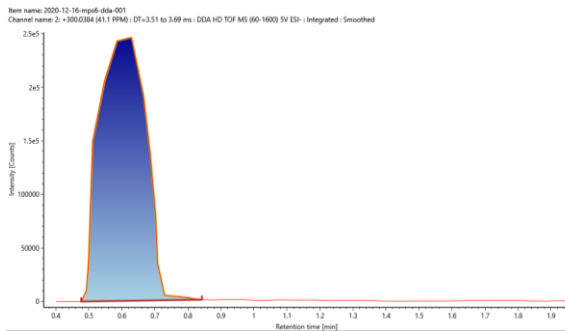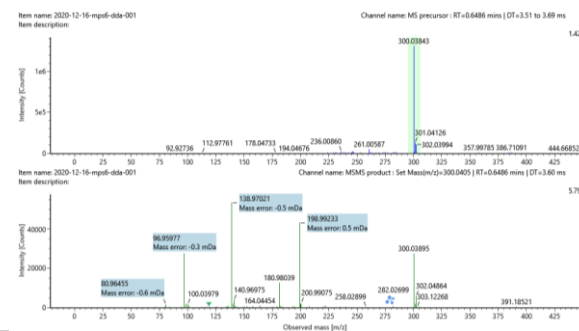



## Figure S6. Limits of detection for glycolipids.

The limits of detection for glycolipids were assessed using ERNDIM SAS samples. Extracted ion chromatograms of lyso-SM, lyso-Gb3, and glucosylsphingosine are shown. For lyso-SM and glucosylsphingosine, the lowest concentrations in the survey year were detected. For lyso-Gb3, the second lowest concentration was detected. Both the quantifier ion (top trace) and the qualifier ion (bottom trace) were detected for lyso-SM and glucosylsphingosine. Only the quantifier ion was detected for lyso-Gb3.

A) Lyso-SM (3.75 nmol/L); peak height = 61,060 counts

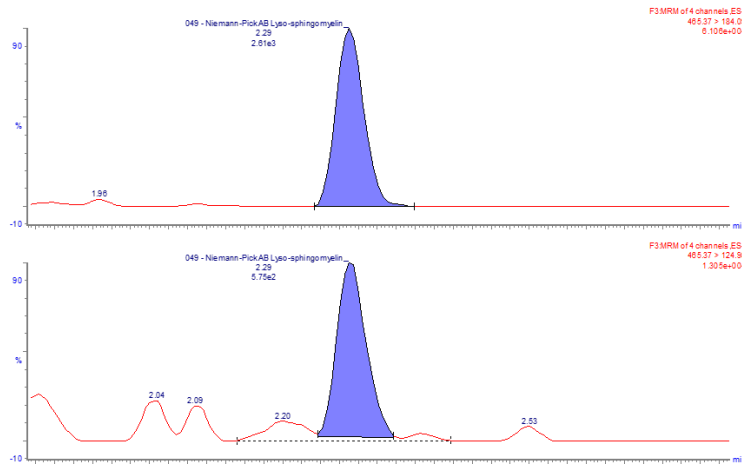

B) Lyso-Gb3 (12.5 nmol/L); peak height = 12,240 counts

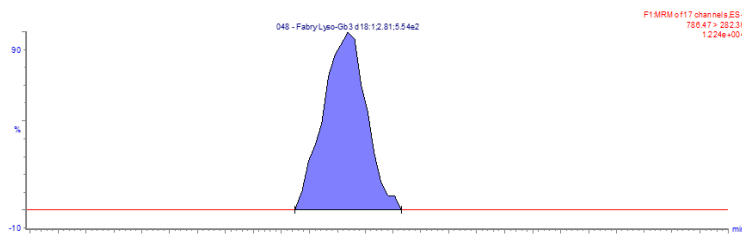

C) Glucosylsphingosine (0.6 nmol/L); peak height = 9,091 counts

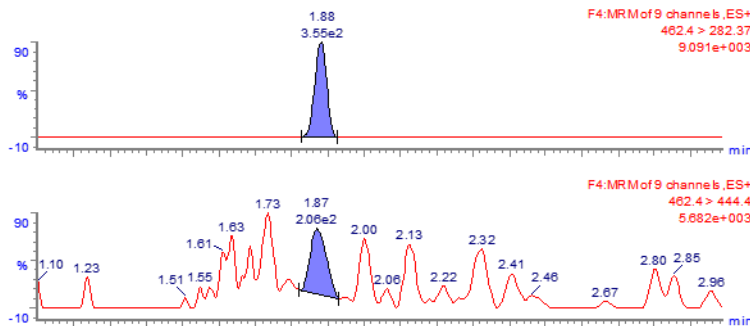

## Table S1. Detailed methods for the LC-MS analyses.

Detailed methods for A) the Vion ion-mobility quadrupole time of flight MS (IMS-qTOF MS) and B) the TQ-S Micro tandem quadrupole MS.

- A) **Vion:** Untargeted analyses were performed with a Waters Acquity H-Class UPLC system coupled to a Waters Vion ion-mobility quadrupole time of flight MS (IMS-qTOF MS). Positive and negative electrospray ionization (ESI) was used in sensitivity mode. Profile-mode data was acquired from 60-1600 m/z over a scan time of 0.2 seconds with Data Independent Acquisition (DIA) and ion mobility (High Definition MS<sup>e</sup>). Soft transmission and a nitrogen-filled collision cell were used. The capillary voltage was 2.5 kV, the cone voltage was 35 V, the source temperature was 120°C, the desolvation gas temperature was 500°C, the cone gas flow was 50 L/h, and the nebulizer gas flow was 1000 L/h, and the collision energy ramp was set to 25-65 V. Leucine-enkephalin was used for lock-mass correction. Before every batch, CCS calibration was performed according to manufacturer directions. Waters Unifi 1.9.4 was used to control the system and analyze data.
- B) **TQ-S Micro:** Targeted analyses were performed on a Waters Acquity H-Class UPLC system coupled to a Waters TQ-S Micro tandem quadrupole MS. Positive and negative ESI was used with rapid polarity switching. Multiple reaction monitoring (MRM) was used at unit resolution. The capillary voltage was 2.5 kV, the source temperature was 150°C, the desolvation gas temperature was 425°C, the cone gas flow was 50 L/h, and the nebulizer gas flow was 1000 L/h. Waters MassLynx 4.2 was used to control the system and TargetLynx XS was used for data analysis. The following MRM table was used for the acquisition method:

|    | Compound                             | Polarity | Q1      | Q3     | Cone (V) | Collision (eV) | RT start, min | RT end, min |
|----|--------------------------------------|----------|---------|--------|----------|----------------|---------------|-------------|
| 1  | NAGA galNAc-O-Ser M+H+               | Pos      | 309.13  | 126.05 | 10       | 15             | 2.3           | 5           |
| 2  | NAGA galNAc-O-Ser M+H+               | Pos      | 309.13  | 186.07 | 10       | 15             | 2.3           | 5           |
| 3  | NAGA GalNAc-O-Thr M+H+               | Pos      | 323.14  | 126.05 | 10       | 15             | 2.3           | 5           |
| 4  | NAGA GalNAc-O-Thr M+H+               | Pos      | 323.14  | 186.08 | 10       | 15             | 2.3           | 5           |
| 5  | Alpha-mann hex2-hexNAc M+H+          | Pos      | 546.2   | 138.06 | 40       | 40             | 2.3           | 5           |
| 6  | Alpha-mann hex2-hexNAc M+H+          | Pos      | 546.2   | 204.09 | 40       | 20             | 2.3           | 5           |
| 7  | GM2 hex2-hexNAc2 M+H+                | Pos      | 749.28  | 204.09 | 30       | 30             | 2.3           | 5           |
| 8  | GM2 hex2-hexNAc2 M+H+                | Pos      | 749.28  | 366.3  | 30       | 20             | 2.3           | 5           |
| 9  | Fabry Lyso-Gb3 d18:1 M+H+            | Pos      | 786.47  | 264.33 | 31       | 32             | 2.3           | 5           |
| 10 | Fabry Lyso-Gb3 d18:1 M+H+            | Pos      | 786.47  | 282.36 | 31       | 34             | 2.3           | 5           |
| 11 | Aspartyl NeuAC-hex-hexNAc-Asn M+H+   | Pos      | 789.29  | 274.09 | 50       | 30             | 2.3           | 5           |
| 12 | Aspartyl NeuAC-hex-hexNAc-Asn M+H+   | Pos      | 789.29  | 336.14 | 50       | 15             | 2.3           | 5           |
| 13 | Aspartyl NeuAC-hex2-hexNAc2-Asn M+H+ | Pos      | 1154.42 | 204.09 | 50       | 50             | 2.3           | 5           |
| 14 | Aspartyl NeuAC-hex2-hexNAc2-Asn M+H+ | Pos      | 1154.42 | 366.14 | 50       | 30             | 2.3           | 5           |
| 15 | Aspartyl NeuAC-hex2-hexNAc2-Asn M+H+ | Pos      | 1154.42 | 657.23 | 50       | 20             | 2.3           | 5           |
| 16 | Sialidosis neuAC-hex3-hexNAc2 M+H+   | Pos      | 1202.42 | 204.08 | 20       | 50             | 2.3           | 5           |
| 17 | Sialidosis neuAC-hex3-hexNAc2 M+H+   | Pos      | 1202.42 | 366.14 | 20       | 40             | 2.3           | 5           |



|    | Compound                                   | Polarity | Q1      | Q3      | Cone (V) | Collision (eV) | RT start, min | RT end, min |
|----|--------------------------------------------|----------|---------|---------|----------|----------------|---------------|-------------|
| 18 | Aspartyl glcNAc-Asn M+H+                   | Pos      | 336.14  | 126.1   | 30       | 20             | 2.9           | 5.8         |
| 19 | Aspartyl glcNAc-Asn M+H+                   | Pos      | 336.14  | 133.1   | 30       | 10             | 2.9           | 5.8         |
| 20 | Fuco fuc-hexNAc-Asn M+H+                   | Pos      | 482.2   | 126.05  | 25       | 35             | 2.9           | 5.8         |
| 21 | Fuco fuc-hexNAc-Asn M+H+                   | Pos      | 482.2   | 133.06  | 20       | 20             | 2.9           | 5.8         |
| 22 | beta-mannosidosis man-glcNAc M+H+          | Pos      | 384.15  | 186.08  | 20       | 15             | 1.8           | 3.8         |
| 23 | beta-mannosidosis man-glcNAc M+H+          | Pos      | 384.15  | 204.09  | 20       | 15             | 1.8           | 3.8         |
| 24 | Niemann-Pick AB Lyso-sphingomyelin M+H+    | Pos      | 465.37  | 124.98  | 35       | 52             | 1.8           | 3.8         |
| 25 | Niemann-Pick AB Lyso-sphingomyelin M+H+    | Pos      | 465.37  | 184.09  | 35       | 20             | 1.8           | 3.8         |
| 26 | glucosyl and galactosyl-sphingosine M+H+   | Pos      | 462.4   | 282.37  | 38       | 22             | 1.1           | 3           |
| 27 | glucosyl and galactosyl-sphingosine M+H+   | Pos      | 462.4   | 444.4   | 24       | 12             | 1.1           | 3           |
| 28 | psychosine d5 M+H+                         | Pos      | 467.44  | 287.38  | 38       | 22             | 1.1           | 3           |
| 29 | psychosine d5 M+H+                         | Pos      | 467.44  | 449.44  | 38       | 14             | 1.1           | 3           |
| 30 | glucosylsphingosine 13c6 M+H+              | Pos      | 468.4   | 282.3   | 30       | 18             | 1.1           | 3           |
| 31 | glucosylsphingosine 13c6 M+H+              | Pos      | 468.4   | 450.37  | 30       | 14             | 1.1           | 3           |
| 32 | Fabry Ceramide Trihexoside d18:1/16:0 M+H+ | Pos      | 1024.67 | 520.5   | 30       | 30             | 1.1           | 3           |
| 33 | Fabry Ceramide Trihexoside d18:1/16:0 M+H+ | Pos      | 1024.67 | 844.62  | 30       | 30             | 1.1           | 3           |
| 34 | Fabry Ceramide Trihexoside d18:1/22:0 M+H+ | Pos      | 1108.77 | 604.6   | 30       | 30             | 1.1           | 3           |
| 35 | Alpha-mann hex3-hexNAc M+H+                | Pos      | 708.26  | 204.09  | 40       | 30             | 3.8           | 6           |
| 36 | Alpha-mann hex3-hexNAc M+H+                | Pos      | 708.26  | 222.1   | 40       | 20             | 3.8           | 6           |
| 37 | Aspartyl hex2-hexNAc2-asn M+H+             | Pos      | 863.33  | 204.09  | 40       | 20             | 3.8           | 6           |
| 38 | Aspartyl hex2-hexNAc2-asn M+H+             | Pos      | 863.33  | 366.14  | 40       | 30             | 3.8           | 6           |
| 39 | Alpha-mann hex4-hexNAc M+H+                | Pos      | 870.31  | 204.09  | 40       | 30             | 3.8           | 6           |
| 40 | Alpha-mann hex4-hexNAc M+H+                | Pos      | 870.31  | 222.1   | 40       | 20             | 3.8           | 6           |
| 41 | GM1 hex3-hexNAc2 M+H+                      | Pos      | 911.33  | 138.1   | 44       | 76             | 3.8           | 6           |
| 42 | GM1 hex3-hexNAc2 M+H+                      | Pos      | 911.33  | 366.14  | 44       | 35             | 3.8           | 6           |
| 43 | GM1 hex3-hexNAc2 M+Na+                     | Pos      | 933.31  | 388.12  | 45       | 60             | 3.8           | 6           |
| 44 | Fuco fuc-hexNAc2-hex3 M+H+                 | Pos      | 1057.39 | 366.17  | 25       | 35             | 3.8           | 6           |
| 45 | Fuco fuc-hexNAc2-hex3 M+H+                 | Pos      | 1057.39 | 512.59  | 25       | 15             | 3.8           | 6           |
| 46 | GM1 hex4-hexNAc2 M+H+                      | Pos      | 1073.38 | 204.08  | 50       | 45             | 3.8           | 6           |
| 47 | GM1 hex4-hexNAc2 M+H+                      | Pos      | 1073.38 | 366.14  | 50       | 35             | 3.8           | 6           |
| 48 | GM1 hex4-hexNAc2 M+Na+                     | Pos      | 1095.36 | 388.12  | 50       | 80             | 3.8           | 6           |
| 49 | GM1 hex4-hexNAc2 M+Na+                     | Pos      | 1095.36 | 550.17  | 50       | 80             | 3.8           | 6           |
| 50 | GM2 hex3-hexNAc3 M+H+                      | Pos      | 1114.42 | 204.09  | 80       | 45             | 3.8           | 6           |
| 51 | GM2 hex3-hexNAc3 M+H+                      | Pos      | 1114.42 | 911.34  | 30       | 15             | 3.8           | 6           |
| 52 | GM2 hex3-hexNAc4 M+H+                      | Pos      | 1317.49 | 204.09  | 80       | 50             | 3.8           | 6           |
| 53 | GM2 hex3-hexNAc4 M+H+                      | Pos      | 1317.49 | 1114.42 | 30       | 20             | 3.8           | 6           |

|    | Compound                              | Polarity | Q1      | Q3     | Cone (V) | Collision (eV) | RT start, min | RT end, min |
|----|---------------------------------------|----------|---------|--------|----------|----------------|---------------|-------------|
| 54 | GM1 hex5-hexNAc3 M+H+                 | Pos      | 1438.52 | 204.08 | 100      | 50             | 3.8           | 6           |
| 55 | GM1 hex5-hexNAc3 M+H+                 | Pos      | 1438.52 | 366.14 | 100      | 35             | 3.8           | 6           |
| 56 | Hexose M-H                            | Neg      | 179     | 58.9   | 32       | 16             | 0.4           | 2.5         |
| 57 | Hexose M-H                            | Neg      | 179     | 88.93  | 32       | 6              | 0.4           | 2.5         |
| 58 | Galactitol M-H                        | Neg      | 181.05  | 58.97  | 5        | 20             | 0.4           | 2.5         |
| 59 | Galactitol M-H                        | Neg      | 181.05  | 100.91 | 5        | 14             | 0.4           | 2.5         |
| 60 | MPS 6 hexNAc-4-6-disulfate M-2H       | Neg      | 189.49  | 96.96  | 10       | 10             | 0.4           | 2.5         |
| 61 | MPS 6 hexNAc-4-6-disulfate M-2H       | Neg      | 189.49  | 138.97 | 10       | 10             | 0.4           | 2.5         |
| 62 | MPS 3 hexN-sulfate M-H                | Neg      | 258.02  | 79.95  | 30       | 30             | 0.4           | 2.5         |
| 63 | MPS 3 hexN-sulfate M-H                | Neg      | 258.02  | 119.05 | 30       | 30             | 0.4           | 2.5         |
| 64 | MPS 3 hexN-sulfate M-H                | Neg      | 258.02  | 137.98 | 30       | 25             | 0.4           | 2.5         |
| 65 | MPS 4 hex-S-hexNAc-S M-2H             | Neg      | 270.51  | 96.96  | 40       | 20             | 0.4           | 2.5         |
| 66 | MPS 4 hex-S-hexNAc-S M-2H             | Neg      | 270.51  | 259.01 | 40       | 10             | 0.4           | 2.5         |
| 67 | hexNAc-x-sulfate M-H                  | Neg      | 300.03  | 96.96  | 10       | 20             | 0.4           | 2.5         |
| 68 | hexNAc-x-sulfate M-H                  | Neg      | 300.03  | 138.98 | 10       | 20             | 0.4           | 2.5         |
| 69 | MPS 6 hexNAc-4-6-disulfate M-H        | Neg      | 379.99  | 300.03 | 10       | 10             | 0.4           | 2.5         |
| 70 | Sialic acid M-H                       | Neg      | 308.1   | 87.01  | 30       | 16             | 0.8           | 3.6         |
| 71 | Sialic acid M-H                       | Neg      | 308.1   | 170.05 | 30       | 12             | 0.8           | 3.6         |
| 72 | MPS 7 UA-hexNAc-S M-H                 | Neg      | 476.07  | 96.96  | 40       | 40             | 0.8           | 3.6         |
| 73 | MPS 7 UA-hexNAc-S M-H                 | Neg      | 476.07  | 193.03 | 40       | 20             | 0.8           | 3.6         |
| 74 | MPS 7 UA-hexNAc-S M-H                 | Neg      | 476.07  | 254.98 | 40       | 20             | 0.8           | 3.6         |
| 75 | MPS 7 UA-hexNAc-S M-H                 | Neg      | 476.07  | 300.03 | 40       | 20             | 0.8           | 3.6         |
| 76 | Aspartyl glcNAc-Asn M-H               | Neg      | 334.13  | 113.04 | 40       | 15             | 2.2           | 6           |
| 77 | Aspartyl glcNAc-Asn M-H               | Neg      | 334.13  | 196.07 | 40       | 15             | 2.2           | 6           |
| 78 | Aspartyl hex-glcNAc-Asn M-H           | Neg      | 496.18  | 196.07 | 25       | 30             | 2.2           | 6           |
| 79 | Aspartyl hex-glcNAc-Asn M-H           | Neg      | 496.18  | 214.08 | 25       | 20             | 2.2           | 6           |
| 80 | hexose3 M-H                           | Neg      | 503.16  | 88.98  | 35       | 48             | 2.2           | 6           |
| 81 | hexose3 M-H                           | Neg      | 503.16  | 161.04 | 35       | 20             | 2.2           | 6           |
| 82 | hexose3 M-H                           | Neg      | 503.16  | 179.07 | 35       | 30             | 2.2           | 6           |
| 83 | MOGS Pompe hexose4 M-H                | Neg      | 665.21  | 88.98  | 44       | 48             | 2.2           | 6           |
| 84 | MOGS Pompe hexose4 M-H                | Neg      | 665.21  | 161.04 | 44       | 20             | 2.2           | 6           |
| 85 | MOGS Pompe hexose4 M-H                | Neg      | 665.21  | 179.07 | 44       | 30             | 2.2           | 6           |
| 86 | hexose5 M-H                           | Neg      | 827.27  | 88.98  | 45       | 48             | 2.2           | 6           |
| 87 | hexose5 M-H                           | Neg      | 827.27  | 161.04 | 45       | 20             | 2.2           | 6           |
| 88 | hexose5 M-H                           | Neg      | 827.27  | 179.07 | 45       | 30             | 2.2           | 6           |
| 89 | MPS 4 and 6 hexNAc-S-UA-hexNAc-S M-2H | Neg      | 379.04  | 96.96  | 40       | 30             | 1.2           | 3           |
| 90 | MPS 4 and 6 hexNAc-S-UA-hexNAc-S M-2H | Neg      | 379.04  | 198.99 | 40       | 20             | 1.2           | 3           |
| 91 | MPS 4 and 6 hexNAc-S-UA-hexNAc-S M-2H | Neg      | 379.04  | 300.03 | 40       | 10             | 1.2           | 3           |

|     | Compound                             | Polarity | Q1     | Q3     | Cone (V) | Collision (eV) | RT start, min | RT end, min |
|-----|--------------------------------------|----------|--------|--------|----------|----------------|---------------|-------------|
| 92  | MPS 7 UA-hexNAc M-H                  | Neg      | 396.11 | 113.02 | 50       | 10             | 1.2           | 3           |
| 93  | MPS 7 UA-hexNAc M-H                  | Neg      | 396.11 | 193.03 | 50       | 10             | 1.2           | 3           |
| 94  | MPS 3 hexN-S-UA M-H                  | Neg      | 434.06 | 113    | 40       | 25             | 1.2           | 3           |
| 95  | MPS 3 hexN-S-UA M-H                  | Neg      | 434.06 | 131.03 | 40       | 25             | 1.2           | 3           |
| 96  | MPS 3 hexN-S-UA M-H                  | Neg      | 434.06 | 157    | 40       | 20             | 1.2           | 3           |
| 97  | MPS 3 hexN-S-UA M-H                  | Neg      | 434.06 | 175.02 | 40       | 20             | 1.2           | 3           |
| 98  | MPS 4 neuAC-hex-hexNAc-S M-H         | Neg      | 753.18 | 96.96  | 20       | 60             | 1.2           | 3           |
| 99  | MPS 4 neuAC-hex-hexNAc-S M-H         | Neg      | 753.18 | 282.02 | 20       | 40             | 1.2           | 3           |
| 100 | MPS 4 neuAC-hex-hexNAc-S M-H         | Neg      | 753.18 | 462.09 | 20       | 20             | 1.2           | 3           |
| 101 | MPS 4 and 6 hexNAc-S-UA-hexNAc-S M-H | Neg      | 759.1  | 175.02 | 40       | 50             | 1.2           | 3           |
| 102 | MPS 4 and 6 hexNAc-S-UA-hexNAc-S M-H | Neg      | 759.1  | 396.11 | 40       | 40             | 1.2           | 3           |
| 103 | MPS 4 and 6 hexNAc-S-UA-hexNAc-S M-H | Neg      | 759.1  | 599.2  | 40       | 30             | 1.2           | 3           |
| 104 | MPS 1 UA-hexNAc-S-UA-hexNAc-S M-2H   | Neg      | 467.06 | 198.99 | 25       | 30             | 1.7           | 4.4         |
| 105 | MPS 1 UA-hexNAc-S-UA-hexNAc-S M-2H   | Neg      | 467.06 | 300.03 | 55       | 15             | 1.7           | 4.4         |
| 106 | MPS 7 hexNAc-UA-hexNAc M-H           | Neg      | 599.19 | 175.02 | 60       | 20             | 1.7           | 4.4         |
| 107 | MPS 7 hexNAc-UA-hexNAc M-H           | Neg      | 599.19 | 396.11 | 60       | 20             | 1.7           | 4.4         |
| 108 | MPS 1 and 2 UA-hexNAc-S-UA M-H       | Neg      | 652.1  | 175.02 | 55       | 40             | 1.7           | 4.4         |
| 109 | MPS 1 and 2 UA-hexNAc-S-UA M-H       | Neg      | 652.1  | 193.03 | 55       | 40             | 1.7           | 4.4         |
| 110 | MPS 1 and 2 UA-hexNAc-S-UA M-H       | Neg      | 652.1  | 396.11 | 55       | 30             | 1.7           | 4.4         |
| 111 | MPS 1 and 2 UA-hexNAc-S-UA M-H       | Neg      | 652.1  | 572.14 | 55       | 10             | 1.7           | 4.4         |
| 112 | MPS 3 813                            | Neg      | 813.16 | 175.02 | 40       | 40             | 1.7           | 4.4         |
| 113 | MPS 3 813                            | Neg      | 813.16 | 557.18 | 40       | 30             | 1.7           | 4.4         |
| 114 | MPS 3b hexNAc-S-UA-hexNAc-UA M-H     | Neg      | 855.18 | 175.02 | 15       | 45             | 1.7           | 4.4         |
| 115 | MPS 3b hexNAc-S-UA-hexNAc-UA M-H     | Neg      | 855.18 | 775.2  | 20       | 15             | 1.7           | 4.4         |
| 116 | MPS 4 hex3-hexNAc2-S M-H             | Neg      | 989.26 | 96.96  | 80       | 70             | 1.7           | 4.4         |
| 117 | MPS 4 hex3-hexNAc2-S M-H             | Neg      | 989.26 | 989.27 | 80       | 12             | 1.7           | 4.4         |
